# Supplementary material for: Approaches for sRNA Analysis of Human RNA-Seq Data: Comparison, Benchmarking
Source: Preprints.org preprint supplement (doi:10.20944/preprints202212.0177.v2), 2023-02-10
Supplement: Supplementary file 4 [file Supplemental_Tables_09022023.xlsx]

## Sheet: S1. Alignment rates
Author	bowtie -v 0 > Rsubread	bowtie -v 1 > Rsubread	hisat2 > Rsubread	STAR > Rsubread	rsem
Delker	0.7	0.94	0.61	0.78	0.56
Donkin	0.86	0.97	0.48	0.44	0.67
Hua	0.81	0.94	0.74	0.48	0.68
Huang	0.79	0.94	0.37	0.85	0.55
Ingerslev	0.71	0.9	0.45	0.49	0.62
Morgan	0.8	0.89	0.67	0.48	0.49
Wong	0.53	0.68	0.46	0.74	0.42
mean rate	0.742857	0.894286	0.54	0.608571	0.57

## Sheet: S2.Assignment rates
Author		bowtie -v 0 > Rsubread	bowtie -v 1 > Rsubread	hisat2 > Rsubread	STAR > Rsubread	rsem
Delker	assigned/aligned	0.54	0.55	0.36	0.37	0.23
Huang		0.56	0.48	0.2	0.34	0.23
Wong		0.49	0.38	0.43	0.25	0.14
Hua		0.27	0.29	0.27	0.36	0.32
Donkin		0.09	0.07	0.05	0.04	0.05
Ingerslev		0.08	0.06	0.06	0.04	0.28
Morgan		0.1	0.1	0.1	0.05	0.53
mean rate		0.304286	0.275714	0.21	0.207143	0.254286
Delker	assigned/all	0.37	0.51	0.27	0.37	0.13
Huang		0.44	0.45	0.13	0.34	0.12
Wong		0.31	0.3	0.29	0.25	0.05
Hua		0.22	0.28	0.25	0.36	0.22
Donkin		0.08	0.07	0.04	0.04	0.04
Ingerslev		0.06	0.05	0.04	0.04	0.17
Morgan		0.08	0.09	0.09	0.05	0.26
mean rate		0.222857	0.25	0.158571	0.207143	0.141429

## Sheet: S3.Assignment rates kallisto&sa
Author	kallisto						salmon
	k=5	k=7	k=9	k=11	k=13	k=15	k=5	k=7	k=9	k=11	k=13	k=15	k=15
Delker	0.8166	0.2142	0.2224	0.3613	0.4214	0.3958	0.6747	0.6034	0.7402	0.7519	0.7452	0.7013	0.6841
Donkin	0.7528	0.2534	0.2648	0.4953	0.4722	0.3958	0.4794	0.4372	0.5677	0.5631	0.5371	0.4763	0.4205
Hua	0.8104	0.4617	0.4644	0.5793	0.6294	0.5933	0.5992	0.5876	0.6568	0.6572	0.6543	0.6474	0.6272
Huang	0.8836	0.0852	0.0858	0.1404	0.1683	0.1591	0.7035	0.6894	0.8178	0.8177	0.8138	0.7988	0.7165
Ingerslev	0.6736	0.1921	0.206	0.436	0.4506	0.3778	0.464	0.4238	0.5551	0.5514	0.5291	0.4788	0.4262
Morgan	0.6532	0.2331	0.2408	0.4325	0.447	0.3821	0.4271	0.406	0.5117	0.5081	0.503	0.4841	0.4521
Wong	0.6878	0.1883	0.1903	0.3406	0.2799	0.2385	0.3253	0.2739	0.4351	0.4363	0.4306	0.4184	0.4109
mean rate	0.754	0.232571	0.239214	0.397914	0.409829	0.3632	0.524743	0.488757	0.612057	0.612243	0.601871	0.572157	0.533929

## Sheet: S4.Number_signif_transcripts (p
Author	method	filtertype	kallisto -k 5	kallisto -k 7	kallisto -k 9	kallisto -k 11	kallisto -k 13	kallisto -k 15	salmon -k 5	salmon -k 7	salmon -k 9	salmon -k 11	salmon -k 13	salmon -k 15	bowtie -v 0 > Rsubread	bowtie -v 1 > Rsubread	hisat2 > Rsubread	STAR > Rsubread	rsem	sRNAnalyzer, 0 mismatches allowed	sRNAnalyzer, 1 mismatch allowed	sRNAnalyzer, 2 mismatches allowed	SPORTS	mean	max	Mean by method
Delker_P	DESeq2	mean>5	14	24	22	46	34	20	30	38	36	31	15	10	22	21	18	25	26	45	20	32	33	26.7619	46	20.6735
Delker_C			1	1	1	0	0	0	2	1	1	1	1	14	4	5	3	3	3	6	7	2	12	3.2381	14
Huang			15	47	48	165	63	52	44	58	62	44	43	14	14	17	6	22	10	23	37	115	36	44.5238	165
Hua			36	42	43	125	116	100	84	71	63	64	68	55	58	71	78	41	94	23	35	158	13	68.4762	158
Donkin			0	0	0	0	0	0	0	0	0	0	0	0	0	0	0	0	0	3	2	5	0	0.47619	5
Ingerslev_UT			0	0	0	0	0	0	0	0	0	0	0	0	0	0	0	0	1	2	2	8	0	0.619048	8
Ingerslev_TD			0	0	0	0	1	0	0	0	0	0	0	0	0	0	0	0	2	1	1	8	0	0.619048	8
Delker_P		median>5	1	6	7	18	13	5	12	16	14	14	8	12	22	18	20	22	15	32	15	12	25	14.619	32	12.7823
Delker_C			0	1	1	0	0	0	2	1	1	1	1	12	5	5	2	4	2	4	5	1	12	2.85714	12
Huang			0	11	12	7	17	9	5	6	7	7	1	2	4	6	2	0	0	4	2	6	0	5.14286	17
Hua			35	45	43	107	111	105	87	63	64	67	75	59	63	73	78	40	93	25	32	121	11	66.5238	121
Donkin			0	0	0	0	0	0	0	0	0	0	0	0	0	0	0	0	0	0	0	0	0	0	0
Ingerslev_UT			0	0	0	0	0	0	0	0	0	0	0	0	0	0	0	0	0	0	1	3	0	0.190476	3
Ingerslev_TD			0	0	0	0	0	0	0	0	0	0	0	0	0	0	0	0	1	0	0	1	1	0.142857	1
Delker_P	edgeR	mean>5	1	0	0	10	11	9	1	0	0	3	0	0	2	3	2	3	0	4	4	0	2	2.61905	11	9.9932
Delker_C			4	0	0	0	0	0	1	1	1	1	1	1	4	5	1	2	0	6	5	1	9	2.04762	9
Huang			0	1	1	8	25	17	0	0	0	0	0	3	7	8	7	5	0	13	8	7	13	5.85714	25
Hua			33	52	45	80	97	112	63	64	51	50	54	56	60	70	74	34	86	14	21	111	16	59.1905	112
Donkin			0	0	0	2	0	0	0	0	0	0	0	0	0	0	0	0	0	0	0	0	0	0.0952381	2
Ingerslev_UT			0	0	0	0	0	0	0	0	0	0	0	0	0	0	0	0	0	0	1	1	0	0.0952381	1
Ingerslev_TD			0	0	0	0	0	0	0	0	0	0	0	0	0	0	0	0	0	0	0	1	0	0.047619	1
Delker_P		median>5	0	0	0	9	11	9	1	0	0	3	0	0	2	3	2	2	0	4	4	1	2	2.52381	11	9.95918
Delker_C			4	0	0	0	0	0	1	1	1	1	1	1	4	5	1	2	0	6	5	1	10	2.09524	10
Huang			0	1	1	8	21	17	0	0	0	0	0	3	7	8	7	5	0	13	8	7	13	5.66667	21
Hua			37	49	52	84	101	88	48	58	56	56	56	54	60	83	75	30	87	16	29	106	18	59.1905	106
Donkin			0	0	0	2	0	0	0	0	0	0	0	0	0	0	0	0	0	0	0	0	0	0.0952381	2
Ingerslev_UT			0	0	0	0	0	0	0	0	0	0	0	0	0	0	0	0	0	0	1	1	0	0.0952381	1
Ingerslev_TD			0	0	0	0	0	0	0	0	0	0	0	0	0	0	0	0	0	0	0	1	0	0.047619	1
Delker_P	limma	mean>5	0	0	0	0	0	0	0	0	0	0	0	0	0	0	0	1	0	0	0	0	1	0.0952381	1	6.42857
Delker_C			0	0	0	0	0	0	1	1	1	1	1	1	1	1	1	1	0	1	1	1	3	0.761905	3
Huang			0	1	1	0	0	0	0	0	0	0	0	0	0	0	0	0	0	0	0	0	0	0.0952381	1
Hua			30	51	38	47	57	109	45	40	37	37	35	30	24	35	53	26	90	5	28	97	11	44.0476	109
Donkin			0	0	0	0	0	0	0	0	0	0	0	0	0	0	0	0	0	0	0	0	0	0	0
Ingerslev_UT			0	0	0	0	0	0	0	0	0	0	0	0	0	0	0	0	0	0	0	0	0	0	0
Ingerslev_TD			0	0	0	0	0	0	0	0	0	0	0	0	0	0	0	0	0	0	0	0	0	0	0
Delker_P		median>5	0	0	0	0	0	0	0	0	0	0	0	0	0	0	0	1	0	0	0	0	1	0.0952381	1	6.43537
Delker_C			0	0	0	0	0	0	1	1	1	1	1	1	1	1	1	1	0	1	1	1	3	0.761905	3
Huang			0	1	1	0	1	0	0	0	0	0	0	0	0	0	0	0	0	0	0	0	0	0.142857	1
Hua			29	45	48	47	57	90	37	36	46	39	41	33	24	48	55	21	90	4	32	92	11	44.0476	92
Donkin			0	0	0	0	0	0	0	0	0	0	0	0	0	0	0	0	0	0	0	0	0	0	0
Ingerslev_UT			0	0	0	0	0	0	0	0	0	0	0	0	0	0	0	0	0	0	0	0	0	0	0
Ingerslev_TD			0	0	0	0	0	0	0	0	0	0	0	0	0	0	0	0	0	0	0	0	0	0	0
Mean for all			5.71429	9	8.66667	18.2143	17.5238	17.6667	11.0714	10.8571	10.5238	10.0238	9.57143	8.59524	9.2381	11.5714	11.5714	6.92857	14.2857	6.07143	7.30952	21.4524	6.09524
Mean by method	DESeq2		7.28571	12.6429	12.6429	33.4286	25.3571	20.7857	19	18.1429	17.7143	16.3571	15.1429	12.7143	13.7143	15.4286	14.7857	11.2143	17.6429	12	11.3571	33.7143	10.2143
	edgeR		5.64286	7.35714	7.07143	14.5	19	18	8.21429	8.85714	7.78571	8.14286	8	8.42857	10.4286	13.2143	12.0714	5.92857	12.3571	5.42857	6.14286	17	5.92857
	limma		4.21429	7	6.28571	6.71429	8.21429	14.2143	6	5.57143	6.07143	5.57143	5.57143	4.64286	3.57143	6.07143	7.85714	3.64286	12.8571	0.785714	4.42857	13.6429	2.14286
Mean by filtering	mean>5		6.38095	10.4286	9.47619	23	19.2381	19.9524	12.9048	13.0476	12	11.0476	10.381	8.7619	9.33333	11.2381	11.5714	7.7619	14.8571	6.95238	8.19048	26.0476	7.09524
	median>5		5.04762	7.57143	7.85714	13.4286	15.8095	15.381	9.2381	8.66667	9.04762	9	8.7619	8.42857	9.14286	11.9048	11.5714	6.09524	13.7143	5.19048	6.42857	16.8571	5.09524
Mean by method and by filtering	DESeq2	mean>5	9.42857	16.2857	16.2857	48	30.5714	24.5714	22.8571	24	23.1429	20	18.1429	13.2857	14	16.2857	15	13	19.4286	14.7143	14.8571	46.8571	13.4286
		median>5	5.14286	9	9	18.8571	20.1429	17	15.1429	12.2857	12.2857	12.7143	12.1429	12.1429	13.4286	14.5714	14.5714	9.42857	15.8571	9.28571	7.85714	20.5714	7
	edgeR	mean>5	5.42857	7.57143	6.57143	14.2857	19	19.7143	9.28571	9.28571	7.42857	7.71429	7.85714	8.57143	10.4286	12.2857	12	6.28571	12.2857	5.28571	5.57143	17.2857	5.71429
		median>5	5.85714	7.14286	7.57143	14.7143	19	16.2857	7.14286	8.42857	8.14286	8.57143	8.14286	8.28571	10.4286	14.1429	12.1429	5.57143	12.4286	5.57143	6.71429	16.7143	6.14286
	limma	mean>5	4.28571	7.42857	5.57143	6.71429	8.14286	15.5714	6.57143	5.85714	5.42857	5.42857	5.14286	4.42857	3.57143	5.14286	7.71429	4	12.8571	0.857143	4.14286	14	2.14286
		median>5	4.14286	6.57143	7	6.71429	8.28571	12.8571	5.42857	5.28571	6.71429	5.71429	6	4.85714	3.57143	7	8	3.28571	12.8571	0.714286	4.71429	13.2857	2.14286

## Sheet: S5. Hobotnica score
Author	Pipeline	method	filtertype	H-score (p-value < 0.05)	H-score (padj < 0.05)
Delker_C	bowtie -v 0 > Rsubread	DESeq2	mean	0.62	0.9
Delker_C	bowtie -v 0 > Rsubread	DESeq2	median	0.61	0.87
Delker_C	bowtie -v 0 > Rsubread	edgeR	mean	0.69	0.9
Delker_C	bowtie -v 0 > Rsubread	edgeR	median	0.69	0.9
Delker_C	bowtie -v 0 > Rsubread	limma	mean	0.82	0.5
Delker_C	bowtie -v 0 > Rsubread	limma	median	0.81	0.5
Delker_C	bowtie -v 1 > Rsubread	DESeq2	mean	0.62	0.86
Delker_C	bowtie -v 1 > Rsubread	DESeq2	median	0.61	0.86
Delker_C	bowtie -v 1 > Rsubread	edgeR	mean	0.65	0.86
Delker_C	bowtie -v 1 > Rsubread	edgeR	median	0.65	0.86
Delker_C	bowtie -v 1 > Rsubread	limma	mean	0.81	0.5
Delker_C	bowtie -v 1 > Rsubread	limma	median	0.81	0.5
Delker_C	hisat2 > Rsubread	DESeq2	mean	0.7	0.88
Delker_C	hisat2 > Rsubread	DESeq2	median	0.67	0.93
Delker_C	hisat2 > Rsubread	edgeR	mean	0.7	0.5
Delker_C	hisat2 > Rsubread	edgeR	median	0.71	0.5
Delker_C	hisat2 > Rsubread	limma	mean	0.83	0.5
Delker_C	hisat2 > Rsubread	limma	median	0.83	0.5
Delker_C	kallisto -k 11	DESeq2	mean	0	0
Delker_C	kallisto -k 11	DESeq2	median	0	0
Delker_C	kallisto -k 11	edgeR	mean	0	0
Delker_C	kallisto -k 11	edgeR	median	0	0
Delker_C	kallisto -k 11	limma	mean	0	0
Delker_C	kallisto -k 11	limma	median	0	0
Delker_C	kallisto -k 13	DESeq2	mean	0	0
Delker_C	kallisto -k 13	DESeq2	median	0	0
Delker_C	kallisto -k 13	edgeR	mean	0	0
Delker_C	kallisto -k 13	edgeR	median	0	0
Delker_C	kallisto -k 13	limma	mean	0	0
Delker_C	kallisto -k 13	limma	median	0	0
Delker_C	kallisto -k 15	DESeq2	mean	0	0
Delker_C	kallisto -k 15	DESeq2	median	0	0
Delker_C	kallisto -k 15	edgeR	mean	0	0
Delker_C	kallisto -k 15	edgeR	median	0	0
Delker_C	kallisto -k 15	limma	mean	0	0
Delker_C	kallisto -k 15	limma	median	0	0
Delker_C	kallisto -k 5	DESeq2	mean	0.6	0.5
Delker_C	kallisto -k 5	DESeq2	median	0	0
Delker_C	kallisto -k 5	edgeR	mean	0.53	0.5
Delker_C	kallisto -k 5	edgeR	median	0.54	0.5
Delker_C	kallisto -k 5	limma	mean	0	0
Delker_C	kallisto -k 5	limma	median	0	0
Delker_C	kallisto -k 7	DESeq2	mean	0.66	0.5
Delker_C	kallisto -k 7	DESeq2	median	0.67	0.5
Delker_C	kallisto -k 7	edgeR	mean	0	0
Delker_C	kallisto -k 7	edgeR	median	0	0
Delker_C	kallisto -k 7	limma	mean	0	0
Delker_C	kallisto -k 7	limma	median	0	0
Delker_C	kallisto -k 9	DESeq2	mean	0.64	0.5
Delker_C	kallisto -k 9	DESeq2	median	0.64	0.5
Delker_C	kallisto -k 9	edgeR	mean	0	0
Delker_C	kallisto -k 9	edgeR	median	0	0
Delker_C	kallisto -k 9	limma	mean	0	0
Delker_C	kallisto -k 9	limma	median	0	0
Delker_C	sRNAnalyzer, 0 mismatches allowed	DESeq2	mean	0.69	0.71
Delker_C	sRNAnalyzer, 0 mismatches allowed	DESeq2	median	0.67	0.88
Delker_C	sRNAnalyzer, 0 mismatches allowed	edgeR	mean	0.75	0.81
Delker_C	sRNAnalyzer, 0 mismatches allowed	edgeR	median	0.72	0.81
Delker_C	sRNAnalyzer, 0 mismatches allowed	limma	mean	0.83	0.5
Delker_C	sRNAnalyzer, 0 mismatches allowed	limma	median	0.83	0.5
Delker_C	sRNAnalyzer, 1 mismatch allowed	DESeq2	mean	0.65	0.83
Delker_C	sRNAnalyzer, 1 mismatch allowed	DESeq2	median	0.63	0.92
Delker_C	sRNAnalyzer, 1 mismatch allowed	edgeR	mean	0.71	0.92
Delker_C	sRNAnalyzer, 1 mismatch allowed	edgeR	median	0.72	0.92
Delker_C	sRNAnalyzer, 1 mismatch allowed	limma	mean	0.8	0.5
Delker_C	sRNAnalyzer, 1 mismatch allowed	limma	median	0.79	0.5
Delker_C	sRNAnalyzer, 2 mismatches allowed	DESeq2	mean	0.61	0.49
Delker_C	sRNAnalyzer, 2 mismatches allowed	DESeq2	median	0.6	0.5
Delker_C	sRNAnalyzer, 2 mismatches allowed	edgeR	mean	0.59	0.5
Delker_C	sRNAnalyzer, 2 mismatches allowed	edgeR	median	0.59	0.5
Delker_C	sRNAnalyzer, 2 mismatches allowed	limma	mean	0.71	0.5
Delker_C	sRNAnalyzer, 2 mismatches allowed	limma	median	0.71	0.5
Delker_C	rsem	DESeq2	mean	0.53	0.48
Delker_C	rsem	DESeq2	median	0.5	0.5
Delker_C	rsem	edgeR	mean	0	0
Delker_C	rsem	edgeR	median	0	0
Delker_C	rsem	limma	mean	0	0
Delker_C	rsem	limma	median	0	0
Delker_C	salmon -k 11	DESeq2	mean	0.57	0.5
Delker_C	salmon -k 11	DESeq2	median	0.61	0.5
Delker_C	salmon -k 11	edgeR	mean	0.69	0.5
Delker_C	salmon -k 11	edgeR	median	0.69	0.5
Delker_C	salmon -k 11	limma	mean	0.88	0.5
Delker_C	salmon -k 11	limma	median	0.88	0.5
Delker_C	salmon -k 13	DESeq2	mean	0.52	0.5
Delker_C	salmon -k 13	DESeq2	median	0.52	0.5
Delker_C	salmon -k 13	edgeR	mean	0.63	0.5
Delker_C	salmon -k 13	edgeR	median	0.63	0.5
Delker_C	salmon -k 13	limma	mean	0.76	0.5
Delker_C	salmon -k 13	limma	median	0.76	0.5
Delker_C	salmon -k 15	DESeq2	mean	0.5	0.63
Delker_C	salmon -k 15	DESeq2	median	0.5	0.64
Delker_C	salmon -k 15	edgeR	mean	0.65	0.5
Delker_C	salmon -k 15	edgeR	median	0.65	0.5
Delker_C	salmon -k 15	limma	mean	0.76	0.5
Delker_C	salmon -k 15	limma	median	0.76	0.5
Delker_C	salmon -k 5	DESeq2	mean	0.52	0.52
Delker_C	salmon -k 5	DESeq2	median	0.53	0.52
Delker_C	salmon -k 5	edgeR	mean	0.66	0.5
Delker_C	salmon -k 5	edgeR	median	0.65	0.5
Delker_C	salmon -k 5	limma	mean	0.87	0.5
Delker_C	salmon -k 5	limma	median	0.87	0.5
Delker_C	salmon -k 7	DESeq2	mean	0.54	0.5
Delker_C	salmon -k 7	DESeq2	median	0.56	0.5
Delker_C	salmon -k 7	edgeR	mean	0.59	0.5
Delker_C	salmon -k 7	edgeR	median	0.59	0.5
Delker_C	salmon -k 7	limma	mean	0.59	0.5
Delker_C	salmon -k 7	limma	median	0.59	0.5
Delker_C	salmon -k 9	DESeq2	mean	0.53	0.5
Delker_C	salmon -k 9	DESeq2	median	0.55	0.5
Delker_C	salmon -k 9	edgeR	mean	0.58	0.5
Delker_C	salmon -k 9	edgeR	median	0.58	0.5
Delker_C	salmon -k 9	limma	mean	0.61	0.5
Delker_C	salmon -k 9	limma	median	0.61	0.5
Delker_C	SPORTS	DESeq2	mean	0.68	0.9
Delker_C	SPORTS	DESeq2	median	0.68	0.9
Delker_C	SPORTS	edgeR	mean	0.69	0.91
Delker_C	SPORTS	edgeR	median	0.69	0.88
Delker_C	SPORTS	limma	mean	0.8	0.93
Delker_C	SPORTS	limma	median	0.8	0.93
Delker_C	STAR > Rsubread	DESeq2	mean	0.65	0.93
Delker_C	STAR > Rsubread	DESeq2	median	0.66	0.9
Delker_C	STAR > Rsubread	edgeR	mean	0.67	0.93
Delker_C	STAR > Rsubread	edgeR	median	0.67	0.93
Delker_C	STAR > Rsubread	limma	mean	0.81	0.5
Delker_C	STAR > Rsubread	limma	median	0.81	0.5
Delker_P	bowtie -v 0 > Rsubread	DESeq2	mean	0.55	0.61
Delker_P	bowtie -v 0 > Rsubread	DESeq2	median	0.54	0.59
Delker_P	bowtie -v 0 > Rsubread	edgeR	mean	0.57	0.55
Delker_P	bowtie -v 0 > Rsubread	edgeR	median	0.57	0.55
Delker_P	bowtie -v 0 > Rsubread	limma	mean	0	0
Delker_P	bowtie -v 0 > Rsubread	limma	median	0	0
Delker_P	bowtie -v 1 > Rsubread	DESeq2	mean	0.57	0.6
Delker_P	bowtie -v 1 > Rsubread	DESeq2	median	0.56	0.6
Delker_P	bowtie -v 1 > Rsubread	edgeR	mean	0.58	0.56
Delker_P	bowtie -v 1 > Rsubread	edgeR	median	0.58	0.56
Delker_P	bowtie -v 1 > Rsubread	limma	mean	0	0
Delker_P	bowtie -v 1 > Rsubread	limma	median	0	0
Delker_P	hisat2 > Rsubread	DESeq2	mean	0.57	0.57
Delker_P	hisat2 > Rsubread	DESeq2	median	0.56	0.6
Delker_P	hisat2 > Rsubread	edgeR	mean	0.65	0.6
Delker_P	hisat2 > Rsubread	edgeR	median	0.65	0.6
Delker_P	hisat2 > Rsubread	limma	mean	0	0
Delker_P	hisat2 > Rsubread	limma	median	0	0
Delker_P	kallisto -k 11	DESeq2	mean	0.56	0.53
Delker_P	kallisto -k 11	DESeq2	median	0.57	0.52
Delker_P	kallisto -k 11	edgeR	mean	0.59	0.53
Delker_P	kallisto -k 11	edgeR	median	0.58	0.52
Delker_P	kallisto -k 11	limma	mean	0	0
Delker_P	kallisto -k 11	limma	median	0	0
Delker_P	kallisto -k 13	DESeq2	mean	0.56	0.54
Delker_P	kallisto -k 13	DESeq2	median	0.54	0.53
Delker_P	kallisto -k 13	edgeR	mean	0.57	0.57
Delker_P	kallisto -k 13	edgeR	median	0.57	0.57
Delker_P	kallisto -k 13	limma	mean	0	0
Delker_P	kallisto -k 13	limma	median	0	0
Delker_P	kallisto -k 15	DESeq2	mean	0.54	0.52
Delker_P	kallisto -k 15	DESeq2	median	0.54	0.5
Delker_P	kallisto -k 15	edgeR	mean	0.54	0.53
Delker_P	kallisto -k 15	edgeR	median	0.54	0.53
Delker_P	kallisto -k 15	limma	mean	0	0
Delker_P	kallisto -k 15	limma	median	0	0
Delker_P	kallisto -k 5	DESeq2	mean	0.5	0.49
Delker_P	kallisto -k 5	DESeq2	median	0.56	0.55
Delker_P	kallisto -k 5	edgeR	mean	0.48	0.55
Delker_P	kallisto -k 5	edgeR	median	0	0
Delker_P	kallisto -k 5	limma	mean	0	0
Delker_P	kallisto -k 5	limma	median	0	0
Delker_P	kallisto -k 7	DESeq2	mean	0.52	0.52
Delker_P	kallisto -k 7	DESeq2	median	0.51	0.48
Delker_P	kallisto -k 7	edgeR	mean	0	0
Delker_P	kallisto -k 7	edgeR	median	0	0
Delker_P	kallisto -k 7	limma	mean	0	0
Delker_P	kallisto -k 7	limma	median	0	0
Delker_P	kallisto -k 9	DESeq2	mean	0.52	0.51
Delker_P	kallisto -k 9	DESeq2	median	0.52	0.5
Delker_P	kallisto -k 9	edgeR	mean	0	0
Delker_P	kallisto -k 9	edgeR	median	0	0
Delker_P	kallisto -k 9	limma	mean	0	0
Delker_P	kallisto -k 9	limma	median	0	0
Delker_P	sRNAnalyzer, 0 mismatches allowed	DESeq2	mean	0.54	0.54
Delker_P	sRNAnalyzer, 0 mismatches allowed	DESeq2	median	0.55	0.53
Delker_P	sRNAnalyzer, 0 mismatches allowed	edgeR	mean	0.65	0.7
Delker_P	sRNAnalyzer, 0 mismatches allowed	edgeR	median	0.65	0.7
Delker_P	sRNAnalyzer, 0 mismatches allowed	limma	mean	0	0
Delker_P	sRNAnalyzer, 0 mismatches allowed	limma	median	0	0
Delker_P	sRNAnalyzer, 1 mismatch allowed	DESeq2	mean	0.56	0.55
Delker_P	sRNAnalyzer, 1 mismatch allowed	DESeq2	median	0.58	0.6
Delker_P	sRNAnalyzer, 1 mismatch allowed	edgeR	mean	0.6	0.68
Delker_P	sRNAnalyzer, 1 mismatch allowed	edgeR	median	0.6	0.68
Delker_P	sRNAnalyzer, 1 mismatch allowed	limma	mean	0	0
Delker_P	sRNAnalyzer, 1 mismatch allowed	limma	median	0	0
Delker_P	sRNAnalyzer, 2 mismatches allowed	DESeq2	mean	0.56	0.54
Delker_P	sRNAnalyzer, 2 mismatches allowed	DESeq2	median	0.59	0.65
Delker_P	sRNAnalyzer, 2 mismatches allowed	edgeR	mean	0	0
Delker_P	sRNAnalyzer, 2 mismatches allowed	edgeR	median	0.6	0.55
Delker_P	sRNAnalyzer, 2 mismatches allowed	limma	mean	0	0
Delker_P	sRNAnalyzer, 2 mismatches allowed	limma	median	0	0
Delker_P	rsem	DESeq2	mean	0.5	0.49
Delker_P	rsem	DESeq2	median	0.5	0.49
Delker_P	rsem	edgeR	mean	0	0
Delker_P	rsem	edgeR	median	0	0
Delker_P	rsem	limma	mean	0	0
Delker_P	rsem	limma	median	0	0
Delker_P	salmon -k 11	DESeq2	mean	0.51	0.5
Delker_P	salmon -k 11	DESeq2	median	0.51	0.5
Delker_P	salmon -k 11	edgeR	mean	0.61	0.61
Delker_P	salmon -k 11	edgeR	median	0.6	0.61
Delker_P	salmon -k 11	limma	mean	0	0
Delker_P	salmon -k 11	limma	median	0	0
Delker_P	salmon -k 13	DESeq2	mean	0.5	0.51
Delker_P	salmon -k 13	DESeq2	median	0.5	0.48
Delker_P	salmon -k 13	edgeR	mean	0	0
Delker_P	salmon -k 13	edgeR	median	0	0
Delker_P	salmon -k 13	limma	mean	0	0
Delker_P	salmon -k 13	limma	median	0	0
Delker_P	salmon -k 15	DESeq2	mean	0.52	0.52
Delker_P	salmon -k 15	DESeq2	median	0.52	0.49
Delker_P	salmon -k 15	edgeR	mean	0	0
Delker_P	salmon -k 15	edgeR	median	0	0
Delker_P	salmon -k 15	limma	mean	0	0
Delker_P	salmon -k 15	limma	median	0	0
Delker_P	salmon -k 5	DESeq2	mean	0.51	0.51
Delker_P	salmon -k 5	DESeq2	median	0.51	0.53
Delker_P	salmon -k 5	edgeR	mean	0.57	0.55
Delker_P	salmon -k 5	edgeR	median	0.58	0.55
Delker_P	salmon -k 5	limma	mean	0	0
Delker_P	salmon -k 5	limma	median	0	0
Delker_P	salmon -k 7	DESeq2	mean	0.51	0.49
Delker_P	salmon -k 7	DESeq2	median	0.51	0.49
Delker_P	salmon -k 7	edgeR	mean	0	0
Delker_P	salmon -k 7	edgeR	median	0	0
Delker_P	salmon -k 7	limma	mean	0	0
Delker_P	salmon -k 7	limma	median	0	0
Delker_P	salmon -k 9	DESeq2	mean	0.51	0.5
Delker_P	salmon -k 9	DESeq2	median	0.5	0.49
Delker_P	salmon -k 9	edgeR	mean	0	0
Delker_P	salmon -k 9	edgeR	median	0	0
Delker_P	salmon -k 9	limma	mean	0	0
Delker_P	salmon -k 9	limma	median	0	0
Delker_P	SPORTS	DESeq2	mean	0.58	0.56
Delker_P	SPORTS	DESeq2	median	0.57	0.56
Delker_P	SPORTS	edgeR	mean	0.59	0.52
Delker_P	SPORTS	edgeR	median	0.59	0.52
Delker_P	SPORTS	limma	mean	0.65	0.55
Delker_P	SPORTS	limma	median	0.65	0.55
Delker_P	STAR > Rsubread	DESeq2	mean	0.56	0.58
Delker_P	STAR > Rsubread	DESeq2	median	0.55	0.57
Delker_P	STAR > Rsubread	edgeR	mean	0.61	0.54
Delker_P	STAR > Rsubread	edgeR	median	0.63	0.55
Delker_P	STAR > Rsubread	limma	mean	0.6	0.55
Delker_P	STAR > Rsubread	limma	median	0.66	0.55
Donkin	bowtie -v 0 > Rsubread	DESeq2	mean	0	0
Donkin	bowtie -v 0 > Rsubread	DESeq2	median	0	0
Donkin	bowtie -v 0 > Rsubread	edgeR	mean	0	0
Donkin	bowtie -v 0 > Rsubread	edgeR	median	0	0
Donkin	bowtie -v 0 > Rsubread	limma	mean	0	0
Donkin	bowtie -v 0 > Rsubread	limma	median	0	0
Donkin	bowtie -v 1 > Rsubread	DESeq2	mean	0	0
Donkin	bowtie -v 1 > Rsubread	DESeq2	median	0	0
Donkin	bowtie -v 1 > Rsubread	edgeR	mean	0	0
Donkin	bowtie -v 1 > Rsubread	edgeR	median	0	0
Donkin	bowtie -v 1 > Rsubread	limma	mean	0	0
Donkin	bowtie -v 1 > Rsubread	limma	median	0	0
Donkin	hisat2 > Rsubread	DESeq2	mean	0	0
Donkin	hisat2 > Rsubread	DESeq2	median	0	0
Donkin	hisat2 > Rsubread	edgeR	mean	0	0
Donkin	hisat2 > Rsubread	edgeR	median	0	0
Donkin	hisat2 > Rsubread	limma	mean	0	0
Donkin	hisat2 > Rsubread	limma	median	0	0
Donkin	kallisto -k 11	DESeq2	mean	0	0
Donkin	kallisto -k 11	DESeq2	median	0	0
Donkin	kallisto -k 11	edgeR	mean	0.7	0.53
Donkin	kallisto -k 11	edgeR	median	0.67	0.53
Donkin	kallisto -k 11	limma	mean	0	0
Donkin	kallisto -k 11	limma	median	0	0
Donkin	kallisto -k 13	DESeq2	mean	0	0
Donkin	kallisto -k 13	DESeq2	median	0	0
Donkin	kallisto -k 13	edgeR	mean	0	0
Donkin	kallisto -k 13	edgeR	median	0	0
Donkin	kallisto -k 13	limma	mean	0	0
Donkin	kallisto -k 13	limma	median	0	0
Donkin	kallisto -k 15	DESeq2	mean	0	0
Donkin	kallisto -k 15	DESeq2	median	0	0
Donkin	kallisto -k 15	edgeR	mean	0	0
Donkin	kallisto -k 15	edgeR	median	0	0
Donkin	kallisto -k 15	limma	mean	0	0
Donkin	kallisto -k 15	limma	median	0	0
Donkin	kallisto -k 5	DESeq2	mean	0	0
Donkin	kallisto -k 5	DESeq2	median	0	0
Donkin	kallisto -k 5	edgeR	mean	0	0
Donkin	kallisto -k 5	edgeR	median	0	0
Donkin	kallisto -k 5	limma	mean	0	0
Donkin	kallisto -k 5	limma	median	0	0
Donkin	kallisto -k 7	DESeq2	mean	0	0
Donkin	kallisto -k 7	DESeq2	median	0	0
Donkin	kallisto -k 7	edgeR	mean	0	0
Donkin	kallisto -k 7	edgeR	median	0	0
Donkin	kallisto -k 7	limma	mean	0	0
Donkin	kallisto -k 7	limma	median	0	0
Donkin	kallisto -k 9	DESeq2	mean	0	0
Donkin	kallisto -k 9	DESeq2	median	0	0
Donkin	kallisto -k 9	edgeR	mean	0	0
Donkin	kallisto -k 9	edgeR	median	0	0
Donkin	kallisto -k 9	limma	mean	0	0
Donkin	kallisto -k 9	limma	median	0	0
Donkin	sRNAnalyzer, 0 mismatches allowed	DESeq2	mean	0.54	0.51
Donkin	sRNAnalyzer, 0 mismatches allowed	DESeq2	median	0	0
Donkin	sRNAnalyzer, 0 mismatches allowed	edgeR	mean	0	0
Donkin	sRNAnalyzer, 0 mismatches allowed	edgeR	median	0	0
Donkin	sRNAnalyzer, 0 mismatches allowed	limma	mean	0	0
Donkin	sRNAnalyzer, 0 mismatches allowed	limma	median	0	0
Donkin	sRNAnalyzer, 1 mismatch allowed	DESeq2	mean	0.52	0.49
Donkin	sRNAnalyzer, 1 mismatch allowed	DESeq2	median	0	0
Donkin	sRNAnalyzer, 1 mismatch allowed	edgeR	mean	0	0
Donkin	sRNAnalyzer, 1 mismatch allowed	edgeR	median	0	0
Donkin	sRNAnalyzer, 1 mismatch allowed	limma	mean	0	0
Donkin	sRNAnalyzer, 1 mismatch allowed	limma	median	0	0
Donkin	sRNAnalyzer, 2 mismatches allowed	DESeq2	mean	0.72	0.55
Donkin	sRNAnalyzer, 2 mismatches allowed	DESeq2	median	0	0
Donkin	sRNAnalyzer, 2 mismatches allowed	edgeR	mean	0	0
Donkin	sRNAnalyzer, 2 mismatches allowed	edgeR	median	0	0
Donkin	sRNAnalyzer, 2 mismatches allowed	limma	mean	0	0
Donkin	sRNAnalyzer, 2 mismatches allowed	limma	median	0	0
Donkin	rsem	DESeq2	mean	0	0
Donkin	rsem	DESeq2	median	0	0
Donkin	rsem	edgeR	mean	0	0
Donkin	rsem	edgeR	median	0	0
Donkin	rsem	limma	mean	0	0
Donkin	rsem	limma	median	0	0
Donkin	salmon -k 11	DESeq2	mean	0	0
Donkin	salmon -k 11	DESeq2	median	0	0
Donkin	salmon -k 11	edgeR	mean	0	0
Donkin	salmon -k 11	edgeR	median	0	0
Donkin	salmon -k 11	limma	mean	0	0
Donkin	salmon -k 11	limma	median	0	0
Donkin	salmon -k 13	DESeq2	mean	0	0
Donkin	salmon -k 13	DESeq2	median	0	0
Donkin	salmon -k 13	edgeR	mean	0	0
Donkin	salmon -k 13	edgeR	median	0	0
Donkin	salmon -k 13	limma	mean	0	0
Donkin	salmon -k 13	limma	median	0	0
Donkin	salmon -k 15	DESeq2	mean	0	0
Donkin	salmon -k 15	DESeq2	median	0	0
Donkin	salmon -k 15	edgeR	mean	0	0
Donkin	salmon -k 15	edgeR	median	0	0
Donkin	salmon -k 15	limma	mean	0	0
Donkin	salmon -k 15	limma	median	0	0
Donkin	salmon -k 5	DESeq2	mean	0	0
Donkin	salmon -k 5	DESeq2	median	0	0
Donkin	salmon -k 5	edgeR	mean	0	0
Donkin	salmon -k 5	edgeR	median	0	0
Donkin	salmon -k 5	limma	mean	0	0
Donkin	salmon -k 5	limma	median	0	0
Donkin	salmon -k 7	DESeq2	mean	0	0
Donkin	salmon -k 7	DESeq2	median	0	0
Donkin	salmon -k 7	edgeR	mean	0	0
Donkin	salmon -k 7	edgeR	median	0	0
Donkin	salmon -k 7	limma	mean	0	0
Donkin	salmon -k 7	limma	median	0	0
Donkin	salmon -k 9	DESeq2	mean	0	0
Donkin	salmon -k 9	DESeq2	median	0	0
Donkin	salmon -k 9	edgeR	mean	0	0
Donkin	salmon -k 9	edgeR	median	0	0
Donkin	salmon -k 9	limma	mean	0	0
Donkin	salmon -k 9	limma	median	0	0
Donkin	SPORTS	DESeq2	mean	0	0
Donkin	SPORTS	DESeq2	median	0	0
Donkin	SPORTS	edgeR	mean	0	0
Donkin	SPORTS	edgeR	median	0	0
Donkin	SPORTS	limma	mean	0	0
Donkin	SPORTS	limma	median	0	0
Donkin	STAR > Rsubread	DESeq2	mean	0	0
Donkin	STAR > Rsubread	DESeq2	median	0	0
Donkin	STAR > Rsubread	edgeR	mean	0	0
Donkin	STAR > Rsubread	edgeR	median	0	0
Donkin	STAR > Rsubread	limma	mean	0	0
Donkin	STAR > Rsubread	limma	median	0	0
Hua	bowtie -v 0 > Rsubread	DESeq2	mean	0.65	0.6
Hua	bowtie -v 0 > Rsubread	DESeq2	median	0.65	0.63
Hua	bowtie -v 0 > Rsubread	edgeR	mean	0.63	0.62
Hua	bowtie -v 0 > Rsubread	edgeR	median	0.64	0.62
Hua	bowtie -v 0 > Rsubread	limma	mean	0.67	0.54
Hua	bowtie -v 0 > Rsubread	limma	median	0.67	0.51
Hua	bowtie -v 1 > Rsubread	DESeq2	mean	0.65	0.66
Hua	bowtie -v 1 > Rsubread	DESeq2	median	0.65	0.68
Hua	bowtie -v 1 > Rsubread	edgeR	mean	0.63	0.64
Hua	bowtie -v 1 > Rsubread	edgeR	median	0.61	0.61
Hua	bowtie -v 1 > Rsubread	limma	mean	0.66	0.67
Hua	bowtie -v 1 > Rsubread	limma	median	0.65	0.64
Hua	hisat2 > Rsubread	DESeq2	mean	0.64	0.61
Hua	hisat2 > Rsubread	DESeq2	median	0.64	0.61
Hua	hisat2 > Rsubread	edgeR	mean	0.64	0.66
Hua	hisat2 > Rsubread	edgeR	median	0.65	0.65
Hua	hisat2 > Rsubread	limma	mean	0.66	0.68
Hua	hisat2 > Rsubread	limma	median	0.66	0.65
Hua	kallisto -k 11	DESeq2	mean	0.54	0.6
Hua	kallisto -k 11	DESeq2	median	0.53	0.61
Hua	kallisto -k 11	edgeR	mean	0.55	0.58
Hua	kallisto -k 11	edgeR	median	0.54	0.63
Hua	kallisto -k 11	limma	mean	0.56	0.66
Hua	kallisto -k 11	limma	median	0.56	0.65
Hua	kallisto -k 13	DESeq2	mean	0.59	0.58
Hua	kallisto -k 13	DESeq2	median	0.57	0.59
Hua	kallisto -k 13	edgeR	mean	0.6	0.59
Hua	kallisto -k 13	edgeR	median	0.58	0.6
Hua	kallisto -k 13	limma	mean	0.64	0.67
Hua	kallisto -k 13	limma	median	0.59	0.64
Hua	kallisto -k 15	DESeq2	mean	0.63	0.58
Hua	kallisto -k 15	DESeq2	median	0.64	0.6
Hua	kallisto -k 15	edgeR	mean	0.63	0.61
Hua	kallisto -k 15	edgeR	median	0.64	0.64
Hua	kallisto -k 15	limma	mean	0.66	0.67
Hua	kallisto -k 15	limma	median	0.65	0.64
Hua	kallisto -k 5	DESeq2	mean	0.52	0.48
Hua	kallisto -k 5	DESeq2	median	0.51	0.49
Hua	kallisto -k 5	edgeR	mean	0.51	0.49
Hua	kallisto -k 5	edgeR	median	0.51	0.49
Hua	kallisto -k 5	limma	mean	0.5	0.5
Hua	kallisto -k 5	limma	median	0.52	0.53
Hua	kallisto -k 7	DESeq2	mean	0.62	0.57
Hua	kallisto -k 7	DESeq2	median	0.64	0.6
Hua	kallisto -k 7	edgeR	mean	0.61	0.65
Hua	kallisto -k 7	edgeR	median	0.63	0.61
Hua	kallisto -k 7	limma	mean	0.6	0.6
Hua	kallisto -k 7	limma	median	0.62	0.62
Hua	kallisto -k 9	DESeq2	mean	0.6	0.58
Hua	kallisto -k 9	DESeq2	median	0.62	0.6
Hua	kallisto -k 9	edgeR	mean	0.6	0.61
Hua	kallisto -k 9	edgeR	median	0.62	0.61
Hua	kallisto -k 9	limma	mean	0.6	0.62
Hua	kallisto -k 9	limma	median	0.61	0.62
Hua	sRNAnalyzer, 0 mismatches allowed	DESeq2	mean	0.56	0.49
Hua	sRNAnalyzer, 0 mismatches allowed	DESeq2	median	0.62	0.61
Hua	sRNAnalyzer, 0 mismatches allowed	edgeR	mean	0.62	0.47
Hua	sRNAnalyzer, 0 mismatches allowed	edgeR	median	0.61	0.57
Hua	sRNAnalyzer, 0 mismatches allowed	limma	mean	0.7	0.46
Hua	sRNAnalyzer, 0 mismatches allowed	limma	median	0.66	0.47
Hua	sRNAnalyzer, 1 mismatch allowed	DESeq2	mean	0.59	0.55
Hua	sRNAnalyzer, 1 mismatch allowed	DESeq2	median	0.64	0.59
Hua	sRNAnalyzer, 1 mismatch allowed	edgeR	mean	0.64	0.63
Hua	sRNAnalyzer, 1 mismatch allowed	edgeR	median	0.63	0.61
Hua	sRNAnalyzer, 1 mismatch allowed	limma	mean	0.67	0.63
Hua	sRNAnalyzer, 1 mismatch allowed	limma	median	0.66	0.69
Hua	sRNAnalyzer, 2 mismatches allowed	DESeq2	mean	0.52	0.51
Hua	sRNAnalyzer, 2 mismatches allowed	DESeq2	median	0.53	0.56
Hua	sRNAnalyzer, 2 mismatches allowed	edgeR	mean	0.54	0.56
Hua	sRNAnalyzer, 2 mismatches allowed	edgeR	median	0.53	0.57
Hua	sRNAnalyzer, 2 mismatches allowed	limma	mean	0.57	0.59
Hua	sRNAnalyzer, 2 mismatches allowed	limma	median	0.56	0.58
Hua	rsem	DESeq2	mean	0.58	0.58
Hua	rsem	DESeq2	median	0.59	0.58
Hua	rsem	edgeR	mean	0.59	0.58
Hua	rsem	edgeR	median	0.59	0.57
Hua	rsem	limma	mean	0.59	0.58
Hua	rsem	limma	median	0.59	0.57
Hua	salmon -k 11	DESeq2	mean	0.64	0.63
Hua	salmon -k 11	DESeq2	median	0.6	0.61
Hua	salmon -k 11	edgeR	mean	0.6	0.56
Hua	salmon -k 11	edgeR	median	0.61	0.64
Hua	salmon -k 11	limma	mean	0.63	0.54
Hua	salmon -k 11	limma	median	0.62	0.6
Hua	salmon -k 13	DESeq2	mean	0.62	0.63
Hua	salmon -k 13	DESeq2	median	0.59	0.61
Hua	salmon -k 13	edgeR	mean	0.61	0.66
Hua	salmon -k 13	edgeR	median	0.6	0.65
Hua	salmon -k 13	limma	mean	0.61	0.6
Hua	salmon -k 13	limma	median	0.62	0.65
Hua	salmon -k 15	DESeq2	mean	0.6	0.57
Hua	salmon -k 15	DESeq2	median	0.57	0.55
Hua	salmon -k 15	edgeR	mean	0.59	0.62
Hua	salmon -k 15	edgeR	median	0.57	0.61
Hua	salmon -k 15	limma	mean	0.58	0.57
Hua	salmon -k 15	limma	median	0.57	0.56
Hua	salmon -k 5	DESeq2	mean	0.62	0.58
Hua	salmon -k 5	DESeq2	median	0.58	0.58
Hua	salmon -k 5	edgeR	mean	0.59	0.57
Hua	salmon -k 5	edgeR	median	0.59	0.61
Hua	salmon -k 5	limma	mean	0.61	0.61
Hua	salmon -k 5	limma	median	0.62	0.67
Hua	salmon -k 7	DESeq2	mean	0.62	0.64
Hua	salmon -k 7	DESeq2	median	0.6	0.6
Hua	salmon -k 7	edgeR	mean	0.6	0.62
Hua	salmon -k 7	edgeR	median	0.6	0.63
Hua	salmon -k 7	limma	mean	0.63	0.59
Hua	salmon -k 7	limma	median	0.64	0.61
Hua	salmon -k 9	DESeq2	mean	0.61	0.63
Hua	salmon -k 9	DESeq2	median	0.6	0.62
Hua	salmon -k 9	edgeR	mean	0.6	0.63
Hua	salmon -k 9	edgeR	median	0.59	0.59
Hua	salmon -k 9	limma	mean	0.62	0.54
Hua	salmon -k 9	limma	median	0.63	0.54
Hua	SPORTS	DESeq2	mean	0.52	0.5
Hua	SPORTS	DESeq2	median	0.52	0.51
Hua	SPORTS	edgeR	mean	0.54	0.52
Hua	SPORTS	edgeR	median	0.54	0.51
Hua	SPORTS	limma	mean	0.55	0.53
Hua	SPORTS	limma	median	0.55	0.5
Hua	STAR > Rsubread	DESeq2	mean	0.66	0.58
Hua	STAR > Rsubread	DESeq2	median	0.64	0.57
Hua	STAR > Rsubread	edgeR	mean	0.64	0.6
Hua	STAR > Rsubread	edgeR	median	0.63	0.62
Hua	STAR > Rsubread	limma	mean	0.68	0.59
Hua	STAR > Rsubread	limma	median	0.67	0.6
Huang	bowtie -v 0 > Rsubread	DESeq2	mean	0.73	0.76
Huang	bowtie -v 0 > Rsubread	DESeq2	median	0.63	0.49
Huang	bowtie -v 0 > Rsubread	edgeR	mean	0.57	0.5
Huang	bowtie -v 0 > Rsubread	edgeR	median	0.57	0.5
Huang	bowtie -v 0 > Rsubread	limma	mean	0	0
Huang	bowtie -v 0 > Rsubread	limma	median	0	0
Huang	bowtie -v 1 > Rsubread	DESeq2	mean	0.71	0.73
Huang	bowtie -v 1 > Rsubread	DESeq2	median	0.6	0.58
Huang	bowtie -v 1 > Rsubread	edgeR	mean	0.58	0.5
Huang	bowtie -v 1 > Rsubread	edgeR	median	0.58	0.5
Huang	bowtie -v 1 > Rsubread	limma	mean	0	0
Huang	bowtie -v 1 > Rsubread	limma	median	0	0
Huang	hisat2 > Rsubread	DESeq2	mean	0.61	0.61
Huang	hisat2 > Rsubread	DESeq2	median	0.55	0.49
Huang	hisat2 > Rsubread	edgeR	mean	0.53	0.48
Huang	hisat2 > Rsubread	edgeR	median	0.53	0.48
Huang	hisat2 > Rsubread	limma	mean	0	0
Huang	hisat2 > Rsubread	limma	median	0	0
Huang	kallisto -k 11	DESeq2	mean	0.68	0.7
Huang	kallisto -k 11	DESeq2	median	0.74	0.52
Huang	kallisto -k 11	edgeR	mean	0.69	0.65
Huang	kallisto -k 11	edgeR	median	0.69	0.65
Huang	kallisto -k 11	limma	mean	0	0
Huang	kallisto -k 11	limma	median	0	0
Huang	kallisto -k 13	DESeq2	mean	0.74	0.76
Huang	kallisto -k 13	DESeq2	median	0.79	0.74
Huang	kallisto -k 13	edgeR	mean	0.73	0.59
Huang	kallisto -k 13	edgeR	median	0.74	0.55
Huang	kallisto -k 13	limma	mean	0	0
Huang	kallisto -k 13	limma	median	0.84	0.5
Huang	kallisto -k 15	DESeq2	mean	0.64	0.59
Huang	kallisto -k 15	DESeq2	median	0.74	0.69
Huang	kallisto -k 15	edgeR	mean	0.7	0.53
Huang	kallisto -k 15	edgeR	median	0.7	0.53
Huang	kallisto -k 15	limma	mean	0	0
Huang	kallisto -k 15	limma	median	0	0
Huang	kallisto -k 5	DESeq2	mean	0.57	0.55
Huang	kallisto -k 5	DESeq2	median	0	0
Huang	kallisto -k 5	edgeR	mean	0	0
Huang	kallisto -k 5	edgeR	median	0	0
Huang	kallisto -k 5	limma	mean	0	0
Huang	kallisto -k 5	limma	median	0	0
Huang	kallisto -k 7	DESeq2	mean	0.59	0.57
Huang	kallisto -k 7	DESeq2	median	0.67	0.66
Huang	kallisto -k 7	edgeR	mean	0.69	0.5
Huang	kallisto -k 7	edgeR	median	0.69	0.5
Huang	kallisto -k 7	limma	mean	0.69	0.5
Huang	kallisto -k 7	limma	median	0.69	0.5
Huang	kallisto -k 9	DESeq2	mean	0.6	0.59
Huang	kallisto -k 9	DESeq2	median	0.62	0.66
Huang	kallisto -k 9	edgeR	mean	0.71	0.5
Huang	kallisto -k 9	edgeR	median	0.71	0.5
Huang	kallisto -k 9	limma	mean	0.76	0.5
Huang	kallisto -k 9	limma	median	0.76	0.5
Huang	sRNAnalyzer, 0 mismatches allowed	DESeq2	mean	0.7	0.68
Huang	sRNAnalyzer, 0 mismatches allowed	DESeq2	median	0.59	0.49
Huang	sRNAnalyzer, 0 mismatches allowed	edgeR	mean	0.62	0.52
Huang	sRNAnalyzer, 0 mismatches allowed	edgeR	median	0.62	0.52
Huang	sRNAnalyzer, 0 mismatches allowed	limma	mean	0	0
Huang	sRNAnalyzer, 0 mismatches allowed	limma	median	0	0
Huang	sRNAnalyzer, 1 mismatch allowed	DESeq2	mean	0.79	0.79
Huang	sRNAnalyzer, 1 mismatch allowed	DESeq2	median	0.58	0.53
Huang	sRNAnalyzer, 1 mismatch allowed	edgeR	mean	0.58	0.65
Huang	sRNAnalyzer, 1 mismatch allowed	edgeR	median	0.58	0.65
Huang	sRNAnalyzer, 1 mismatch allowed	limma	mean	0	0
Huang	sRNAnalyzer, 1 mismatch allowed	limma	median	0	0
Huang	sRNAnalyzer, 2 mismatches allowed	DESeq2	mean	0.69	0.71
Huang	sRNAnalyzer, 2 mismatches allowed	DESeq2	median	0.68	0.73
Huang	sRNAnalyzer, 2 mismatches allowed	edgeR	mean	0.6	0.76
Huang	sRNAnalyzer, 2 mismatches allowed	edgeR	median	0.61	0.76
Huang	sRNAnalyzer, 2 mismatches allowed	limma	mean	0	0
Huang	sRNAnalyzer, 2 mismatches allowed	limma	median	0	0
Huang	rsem	DESeq2	mean	0.68	0.66
Huang	rsem	DESeq2	median	0	0
Huang	rsem	edgeR	mean	0	0
Huang	rsem	edgeR	median	0	0
Huang	rsem	limma	mean	0	0
Huang	rsem	limma	median	0	0
Huang	salmon -k 11	DESeq2	mean	0.75	0.78
Huang	salmon -k 11	DESeq2	median	0.59	0.7
Huang	salmon -k 11	edgeR	mean	0	0
Huang	salmon -k 11	edgeR	median	0	0
Huang	salmon -k 11	limma	mean	0	0
Huang	salmon -k 11	limma	median	0	0
Huang	salmon -k 13	DESeq2	mean	0.7	0.77
Huang	salmon -k 13	DESeq2	median	0.57	0.5
Huang	salmon -k 13	edgeR	mean	0	0
Huang	salmon -k 13	edgeR	median	0	0
Huang	salmon -k 13	limma	mean	0	0
Huang	salmon -k 13	limma	median	0	0
Huang	salmon -k 15	DESeq2	mean	0.68	0.7
Huang	salmon -k 15	DESeq2	median	0.6	0.49
Huang	salmon -k 15	edgeR	mean	0.59	0.5
Huang	salmon -k 15	edgeR	median	0.59	0.5
Huang	salmon -k 15	limma	mean	0	0
Huang	salmon -k 15	limma	median	0	0
Huang	salmon -k 5	DESeq2	mean	0.71	0.69
Huang	salmon -k 5	DESeq2	median	0.62	0.67
Huang	salmon -k 5	edgeR	mean	0	0
Huang	salmon -k 5	edgeR	median	0	0
Huang	salmon -k 5	limma	mean	0	0
Huang	salmon -k 5	limma	median	0	0
Huang	salmon -k 7	DESeq2	mean	0.73	0.8
Huang	salmon -k 7	DESeq2	median	0.57	0.73
Huang	salmon -k 7	edgeR	mean	0	0
Huang	salmon -k 7	edgeR	median	0	0
Huang	salmon -k 7	limma	mean	0	0
Huang	salmon -k 7	limma	median	0	0
Huang	salmon -k 9	DESeq2	mean	0.73	0.75
Huang	salmon -k 9	DESeq2	median	0.58	0.7
Huang	salmon -k 9	edgeR	mean	0	0
Huang	salmon -k 9	edgeR	median	0	0
Huang	salmon -k 9	limma	mean	0	0
Huang	salmon -k 9	limma	median	0	0
Huang	SPORTS	DESeq2	mean	0.7	0.75
Huang	SPORTS	DESeq2	median	0	0
Huang	SPORTS	edgeR	mean	0.63	0.49
Huang	SPORTS	edgeR	median	0.63	0.49
Huang	SPORTS	limma	mean	0	0
Huang	SPORTS	limma	median	0	0
Huang	STAR > Rsubread	DESeq2	mean	0.68	0.74
Huang	STAR > Rsubread	DESeq2	median	0	0
Huang	STAR > Rsubread	edgeR	mean	0.55	0.51
Huang	STAR > Rsubread	edgeR	median	0.55	0.51
Huang	STAR > Rsubread	limma	mean	0	0
Huang	STAR > Rsubread	limma	median	0	0
Ingerslev_TD	bowtie -v 0 > Rsubread	DESeq2	mean	0	0
Ingerslev_TD	bowtie -v 0 > Rsubread	DESeq2	median	0	0
Ingerslev_TD	bowtie -v 0 > Rsubread	edgeR	mean	0	0
Ingerslev_TD	bowtie -v 0 > Rsubread	edgeR	median	0	0
Ingerslev_TD	bowtie -v 0 > Rsubread	limma	mean	0	0
Ingerslev_TD	bowtie -v 0 > Rsubread	limma	median	0	0
Ingerslev_TD	bowtie -v 1 > Rsubread	DESeq2	mean	0	0
Ingerslev_TD	bowtie -v 1 > Rsubread	DESeq2	median	0	0
Ingerslev_TD	bowtie -v 1 > Rsubread	edgeR	mean	0	0
Ingerslev_TD	bowtie -v 1 > Rsubread	edgeR	median	0	0
Ingerslev_TD	bowtie -v 1 > Rsubread	limma	mean	0	0
Ingerslev_TD	bowtie -v 1 > Rsubread	limma	median	0	0
Ingerslev_TD	hisat2 > Rsubread	DESeq2	mean	0	0
Ingerslev_TD	hisat2 > Rsubread	DESeq2	median	0	0
Ingerslev_TD	hisat2 > Rsubread	edgeR	mean	0	0
Ingerslev_TD	hisat2 > Rsubread	edgeR	median	0	0
Ingerslev_TD	hisat2 > Rsubread	limma	mean	0	0
Ingerslev_TD	hisat2 > Rsubread	limma	median	0	0
Ingerslev_TD	kallisto -k 11	DESeq2	mean	0	0
Ingerslev_TD	kallisto -k 11	DESeq2	median	0	0
Ingerslev_TD	kallisto -k 11	edgeR	mean	0	0
Ingerslev_TD	kallisto -k 11	edgeR	median	0	0
Ingerslev_TD	kallisto -k 11	limma	mean	0	0
Ingerslev_TD	kallisto -k 11	limma	median	0	0
Ingerslev_TD	kallisto -k 13	DESeq2	mean	0.61	0.53
Ingerslev_TD	kallisto -k 13	DESeq2	median	0	0
Ingerslev_TD	kallisto -k 13	edgeR	mean	0	0
Ingerslev_TD	kallisto -k 13	edgeR	median	0	0
Ingerslev_TD	kallisto -k 13	limma	mean	0	0
Ingerslev_TD	kallisto -k 13	limma	median	0	0
Ingerslev_TD	kallisto -k 15	DESeq2	mean	0	0
Ingerslev_TD	kallisto -k 15	DESeq2	median	0	0
Ingerslev_TD	kallisto -k 15	edgeR	mean	0	0
Ingerslev_TD	kallisto -k 15	edgeR	median	0	0
Ingerslev_TD	kallisto -k 15	limma	mean	0	0
Ingerslev_TD	kallisto -k 15	limma	median	0	0
Ingerslev_TD	kallisto -k 5	DESeq2	mean	0	0
Ingerslev_TD	kallisto -k 5	DESeq2	median	0	0
Ingerslev_TD	kallisto -k 5	edgeR	mean	0	0
Ingerslev_TD	kallisto -k 5	edgeR	median	0	0
Ingerslev_TD	kallisto -k 5	limma	mean	0	0
Ingerslev_TD	kallisto -k 5	limma	median	0	0
Ingerslev_TD	kallisto -k 7	DESeq2	mean	0	0
Ingerslev_TD	kallisto -k 7	DESeq2	median	0	0
Ingerslev_TD	kallisto -k 7	edgeR	mean	0	0
Ingerslev_TD	kallisto -k 7	edgeR	median	0	0
Ingerslev_TD	kallisto -k 7	limma	mean	0	0
Ingerslev_TD	kallisto -k 7	limma	median	0	0
Ingerslev_TD	kallisto -k 9	DESeq2	mean	0	0
Ingerslev_TD	kallisto -k 9	DESeq2	median	0	0
Ingerslev_TD	kallisto -k 9	edgeR	mean	0	0
Ingerslev_TD	kallisto -k 9	edgeR	median	0	0
Ingerslev_TD	kallisto -k 9	limma	mean	0	0
Ingerslev_TD	kallisto -k 9	limma	median	0	0
Ingerslev_TD	sRNAnalyzer, 0 mismatches allowed	DESeq2	mean	0.72	0.53
Ingerslev_TD	sRNAnalyzer, 0 mismatches allowed	DESeq2	median	0	0
Ingerslev_TD	sRNAnalyzer, 0 mismatches allowed	edgeR	mean	0	0
Ingerslev_TD	sRNAnalyzer, 0 mismatches allowed	edgeR	median	0	0
Ingerslev_TD	sRNAnalyzer, 0 mismatches allowed	limma	mean	0	0
Ingerslev_TD	sRNAnalyzer, 0 mismatches allowed	limma	median	0	0
Ingerslev_TD	sRNAnalyzer, 1 mismatch allowed	DESeq2	mean	0.59	0.53
Ingerslev_TD	sRNAnalyzer, 1 mismatch allowed	DESeq2	median	0	0
Ingerslev_TD	sRNAnalyzer, 1 mismatch allowed	edgeR	mean	0	0
Ingerslev_TD	sRNAnalyzer, 1 mismatch allowed	edgeR	median	0	0
Ingerslev_TD	sRNAnalyzer, 1 mismatch allowed	limma	mean	0	0
Ingerslev_TD	sRNAnalyzer, 1 mismatch allowed	limma	median	0	0
Ingerslev_TD	sRNAnalyzer, 2 mismatches allowed	DESeq2	mean	0.89	0.77
Ingerslev_TD	sRNAnalyzer, 2 mismatches allowed	DESeq2	median	0.84	0.53
Ingerslev_TD	sRNAnalyzer, 2 mismatches allowed	edgeR	mean	0.81	0.53
Ingerslev_TD	sRNAnalyzer, 2 mismatches allowed	edgeR	median	0.78	0.53
Ingerslev_TD	sRNAnalyzer, 2 mismatches allowed	limma	mean	0	0
Ingerslev_TD	sRNAnalyzer, 2 mismatches allowed	limma	median	0	0
Ingerslev_TD	rsem	DESeq2	mean	0.56	0.5
Ingerslev_TD	rsem	DESeq2	median	0.49	0.53
Ingerslev_TD	rsem	edgeR	mean	0	0
Ingerslev_TD	rsem	edgeR	median	0	0
Ingerslev_TD	rsem	limma	mean	0	0
Ingerslev_TD	rsem	limma	median	0	0
Ingerslev_TD	salmon -k 11	DESeq2	mean	0	0
Ingerslev_TD	salmon -k 11	DESeq2	median	0	0
Ingerslev_TD	salmon -k 11	edgeR	mean	0	0
Ingerslev_TD	salmon -k 11	edgeR	median	0	0
Ingerslev_TD	salmon -k 11	limma	mean	0	0
Ingerslev_TD	salmon -k 11	limma	median	0	0
Ingerslev_TD	salmon -k 13	DESeq2	mean	0	0
Ingerslev_TD	salmon -k 13	DESeq2	median	0	0
Ingerslev_TD	salmon -k 13	edgeR	mean	0	0
Ingerslev_TD	salmon -k 13	edgeR	median	0	0
Ingerslev_TD	salmon -k 13	limma	mean	0	0
Ingerslev_TD	salmon -k 13	limma	median	0	0
Ingerslev_TD	salmon -k 15	DESeq2	mean	0	0
Ingerslev_TD	salmon -k 15	DESeq2	median	0	0
Ingerslev_TD	salmon -k 15	edgeR	mean	0	0
Ingerslev_TD	salmon -k 15	edgeR	median	0	0
Ingerslev_TD	salmon -k 15	limma	mean	0	0
Ingerslev_TD	salmon -k 15	limma	median	0	0
Ingerslev_TD	salmon -k 5	DESeq2	mean	0	0
Ingerslev_TD	salmon -k 5	DESeq2	median	0	0
Ingerslev_TD	salmon -k 5	edgeR	mean	0	0
Ingerslev_TD	salmon -k 5	edgeR	median	0	0
Ingerslev_TD	salmon -k 5	limma	mean	0	0
Ingerslev_TD	salmon -k 5	limma	median	0	0
Ingerslev_TD	salmon -k 7	DESeq2	mean	0	0
Ingerslev_TD	salmon -k 7	DESeq2	median	0	0
Ingerslev_TD	salmon -k 7	edgeR	mean	0	0
Ingerslev_TD	salmon -k 7	edgeR	median	0	0
Ingerslev_TD	salmon -k 7	limma	mean	0	0
Ingerslev_TD	salmon -k 7	limma	median	0	0
Ingerslev_TD	salmon -k 9	DESeq2	mean	0	0
Ingerslev_TD	salmon -k 9	DESeq2	median	0	0
Ingerslev_TD	salmon -k 9	edgeR	mean	0	0
Ingerslev_TD	salmon -k 9	edgeR	median	0	0
Ingerslev_TD	salmon -k 9	limma	mean	0	0
Ingerslev_TD	salmon -k 9	limma	median	0	0
Ingerslev_TD	SPORTS	DESeq2	mean	0	0
Ingerslev_TD	SPORTS	DESeq2	median	0.54	0.53
Ingerslev_TD	SPORTS	edgeR	mean	0	0
Ingerslev_TD	SPORTS	edgeR	median	0	0
Ingerslev_TD	SPORTS	limma	mean	0	0
Ingerslev_TD	SPORTS	limma	median	0	0
Ingerslev_TD	STAR > Rsubread	DESeq2	mean	0	0
Ingerslev_TD	STAR > Rsubread	DESeq2	median	0	0
Ingerslev_TD	STAR > Rsubread	edgeR	mean	0	0
Ingerslev_TD	STAR > Rsubread	edgeR	median	0	0
Ingerslev_TD	STAR > Rsubread	limma	mean	0	0
Ingerslev_TD	STAR > Rsubread	limma	median	0	0
Ingerslev_UT	bowtie -v 0 > Rsubread	DESeq2	mean	0	0
Ingerslev_UT	bowtie -v 0 > Rsubread	DESeq2	median	0	0
Ingerslev_UT	bowtie -v 0 > Rsubread	edgeR	mean	0	0
Ingerslev_UT	bowtie -v 0 > Rsubread	edgeR	median	0	0
Ingerslev_UT	bowtie -v 0 > Rsubread	limma	mean	0	0
Ingerslev_UT	bowtie -v 0 > Rsubread	limma	median	0	0
Ingerslev_UT	bowtie -v 1 > Rsubread	DESeq2	mean	0	0
Ingerslev_UT	bowtie -v 1 > Rsubread	DESeq2	median	0	0
Ingerslev_UT	bowtie -v 1 > Rsubread	edgeR	mean	0	0
Ingerslev_UT	bowtie -v 1 > Rsubread	edgeR	median	0	0
Ingerslev_UT	bowtie -v 1 > Rsubread	limma	mean	0	0
Ingerslev_UT	bowtie -v 1 > Rsubread	limma	median	0	0
Ingerslev_UT	hisat2 > Rsubread	DESeq2	mean	0	0
Ingerslev_UT	hisat2 > Rsubread	DESeq2	median	0	0
Ingerslev_UT	hisat2 > Rsubread	edgeR	mean	0	0
Ingerslev_UT	hisat2 > Rsubread	edgeR	median	0	0
Ingerslev_UT	hisat2 > Rsubread	limma	mean	0	0
Ingerslev_UT	hisat2 > Rsubread	limma	median	0	0
Ingerslev_UT	kallisto -k 11	DESeq2	mean	0	0
Ingerslev_UT	kallisto -k 11	DESeq2	median	0	0
Ingerslev_UT	kallisto -k 11	edgeR	mean	0	0
Ingerslev_UT	kallisto -k 11	edgeR	median	0	0
Ingerslev_UT	kallisto -k 11	limma	mean	0	0
Ingerslev_UT	kallisto -k 11	limma	median	0	0
Ingerslev_UT	kallisto -k 13	DESeq2	mean	0	0
Ingerslev_UT	kallisto -k 13	DESeq2	median	0	0
Ingerslev_UT	kallisto -k 13	edgeR	mean	0	0
Ingerslev_UT	kallisto -k 13	edgeR	median	0	0
Ingerslev_UT	kallisto -k 13	limma	mean	0	0
Ingerslev_UT	kallisto -k 13	limma	median	0	0
Ingerslev_UT	kallisto -k 15	DESeq2	mean	0	0
Ingerslev_UT	kallisto -k 15	DESeq2	median	0	0
Ingerslev_UT	kallisto -k 15	edgeR	mean	0	0
Ingerslev_UT	kallisto -k 15	edgeR	median	0	0
Ingerslev_UT	kallisto -k 15	limma	mean	0	0
Ingerslev_UT	kallisto -k 15	limma	median	0	0
Ingerslev_UT	kallisto -k 5	DESeq2	mean	0	0
Ingerslev_UT	kallisto -k 5	DESeq2	median	0	0
Ingerslev_UT	kallisto -k 5	edgeR	mean	0	0
Ingerslev_UT	kallisto -k 5	edgeR	median	0	0
Ingerslev_UT	kallisto -k 5	limma	mean	0	0
Ingerslev_UT	kallisto -k 5	limma	median	0	0
Ingerslev_UT	kallisto -k 7	DESeq2	mean	0	0
Ingerslev_UT	kallisto -k 7	DESeq2	median	0	0
Ingerslev_UT	kallisto -k 7	edgeR	mean	0	0
Ingerslev_UT	kallisto -k 7	edgeR	median	0	0
Ingerslev_UT	kallisto -k 7	limma	mean	0	0
Ingerslev_UT	kallisto -k 7	limma	median	0	0
Ingerslev_UT	kallisto -k 9	DESeq2	mean	0	0
Ingerslev_UT	kallisto -k 9	DESeq2	median	0	0
Ingerslev_UT	kallisto -k 9	edgeR	mean	0	0
Ingerslev_UT	kallisto -k 9	edgeR	median	0	0
Ingerslev_UT	kallisto -k 9	limma	mean	0	0
Ingerslev_UT	kallisto -k 9	limma	median	0	0
Ingerslev_UT	sRNAnalyzer, 0 mismatches allowed	DESeq2	mean	0.55	0.51
Ingerslev_UT	sRNAnalyzer, 0 mismatches allowed	DESeq2	median	0	0
Ingerslev_UT	sRNAnalyzer, 0 mismatches allowed	edgeR	mean	0	0
Ingerslev_UT	sRNAnalyzer, 0 mismatches allowed	edgeR	median	0	0
Ingerslev_UT	sRNAnalyzer, 0 mismatches allowed	limma	mean	0	0
Ingerslev_UT	sRNAnalyzer, 0 mismatches allowed	limma	median	0	0
Ingerslev_UT	sRNAnalyzer, 1 mismatch allowed	DESeq2	mean	0.6	0.51
Ingerslev_UT	sRNAnalyzer, 1 mismatch allowed	DESeq2	median	0.65	0.5
Ingerslev_UT	sRNAnalyzer, 1 mismatch allowed	edgeR	mean	0.61	0.5
Ingerslev_UT	sRNAnalyzer, 1 mismatch allowed	edgeR	median	0.6	0.5
Ingerslev_UT	sRNAnalyzer, 1 mismatch allowed	limma	mean	0	0
Ingerslev_UT	sRNAnalyzer, 1 mismatch allowed	limma	median	0	0
Ingerslev_UT	sRNAnalyzer, 2 mismatches allowed	DESeq2	mean	0.87	0.6
Ingerslev_UT	sRNAnalyzer, 2 mismatches allowed	DESeq2	median	0.87	0.8
Ingerslev_UT	sRNAnalyzer, 2 mismatches allowed	edgeR	mean	0.8	0.5
Ingerslev_UT	sRNAnalyzer, 2 mismatches allowed	edgeR	median	0.8	0.5
Ingerslev_UT	sRNAnalyzer, 2 mismatches allowed	limma	mean	0	0
Ingerslev_UT	sRNAnalyzer, 2 mismatches allowed	limma	median	0	0
Ingerslev_UT	rsem	DESeq2	mean	0.52	0.5
Ingerslev_UT	rsem	DESeq2	median	0	0
Ingerslev_UT	rsem	edgeR	mean	0	0
Ingerslev_UT	rsem	edgeR	median	0	0
Ingerslev_UT	rsem	limma	mean	0	0
Ingerslev_UT	rsem	limma	median	0	0
Ingerslev_UT	salmon -k 11	DESeq2	mean	0	0
Ingerslev_UT	salmon -k 11	DESeq2	median	0	0
Ingerslev_UT	salmon -k 11	edgeR	mean	0	0
Ingerslev_UT	salmon -k 11	edgeR	median	0	0
Ingerslev_UT	salmon -k 11	limma	mean	0	0
Ingerslev_UT	salmon -k 11	limma	median	0	0
Ingerslev_UT	salmon -k 13	DESeq2	mean	0	0
Ingerslev_UT	salmon -k 13	DESeq2	median	0	0
Ingerslev_UT	salmon -k 13	edgeR	mean	0	0
Ingerslev_UT	salmon -k 13	edgeR	median	0	0
Ingerslev_UT	salmon -k 13	limma	mean	0	0
Ingerslev_UT	salmon -k 13	limma	median	0	0
Ingerslev_UT	salmon -k 15	DESeq2	mean	0	0
Ingerslev_UT	salmon -k 15	DESeq2	median	0	0
Ingerslev_UT	salmon -k 15	edgeR	mean	0	0
Ingerslev_UT	salmon -k 15	edgeR	median	0	0
Ingerslev_UT	salmon -k 15	limma	mean	0	0
Ingerslev_UT	salmon -k 15	limma	median	0	0
Ingerslev_UT	salmon -k 5	DESeq2	mean	0	0
Ingerslev_UT	salmon -k 5	DESeq2	median	0	0
Ingerslev_UT	salmon -k 5	edgeR	mean	0	0
Ingerslev_UT	salmon -k 5	edgeR	median	0	0
Ingerslev_UT	salmon -k 5	limma	mean	0	0
Ingerslev_UT	salmon -k 5	limma	median	0	0
Ingerslev_UT	salmon -k 7	DESeq2	mean	0	0
Ingerslev_UT	salmon -k 7	DESeq2	median	0	0
Ingerslev_UT	salmon -k 7	edgeR	mean	0	0
Ingerslev_UT	salmon -k 7	edgeR	median	0	0
Ingerslev_UT	salmon -k 7	limma	mean	0	0
Ingerslev_UT	salmon -k 7	limma	median	0	0
Ingerslev_UT	salmon -k 9	DESeq2	mean	0	0
Ingerslev_UT	salmon -k 9	DESeq2	median	0	0
Ingerslev_UT	salmon -k 9	edgeR	mean	0	0
Ingerslev_UT	salmon -k 9	edgeR	median	0	0
Ingerslev_UT	salmon -k 9	limma	mean	0	0
Ingerslev_UT	salmon -k 9	limma	median	0	0
Ingerslev_UT	SPORTS	DESeq2	mean	0	0
Ingerslev_UT	SPORTS	DESeq2	median	0	0
Ingerslev_UT	SPORTS	edgeR	mean	0	0
Ingerslev_UT	SPORTS	edgeR	median	0	0
Ingerslev_UT	SPORTS	limma	mean	0	0
Ingerslev_UT	SPORTS	limma	median	0	0
Ingerslev_UT	STAR > Rsubread	DESeq2	mean	0	0
Ingerslev_UT	STAR > Rsubread	DESeq2	median	0	0
Ingerslev_UT	STAR > Rsubread	edgeR	mean	0	0
Ingerslev_UT	STAR > Rsubread	edgeR	median	0	0
Ingerslev_UT	STAR > Rsubread	limma	mean	0	0
Ingerslev_UT	STAR > Rsubread	limma	median	0	0

## Sheet: S6.tsRNA Assign rates by tsRNA 
Author	kmer length	bowtie0	bowtie1_5	hisat2_5	STAR_5
Delker	5	0.9617	0.73	0.8836	0.6552
Donkin		0.9853	0.8678	0.9948	0.8741
Hua		0.9942	0.8281	0.984	0.9174
Huang		0.9805	0.868	0.9829	0.6196
Ingerslev		0.9629	0.7352	0.8963	0.7398
Morgan		0.9766	0.7087	0.9823	0.803
Wong		0.9087	0.6475	0.9076	0.3387
Delker	7	0.9618	0.7419	0.8717	0.6794
Donkin		0.9826	0.9005	0.9948	0.8973
Hua		0.9942	0.8417	0.9841	0.9337
Huang		0.9805	0.8799	0.9845	0.6273
Ingerslev		0.9619	0.7654	0.8748	0.7898
Morgan		0.9764	0.7223	0.9827	0.8261
Wong		0.8957	0.645	0.9031	0.3411
Delker	9	0.9729	0.8714	0.9487	0.7682
Donkin		0.9839	0.957	0.9967	0.943
Hua		0.9946	0.9497	0.9871	0.9691
Huang		0.9804	0.9056	0.9912	0.658
Ingerslev		0.9634	0.8935	0.9608	0.8939
Morgan		0.9771	0.8904	0.9854	0.9178
Wong		0.8983	0.7479	0.9184	0.4537
Delker	11	0.964	0.8989	0.9647	0.7955
Donkin		0.9843	0.9713	0.9968	0.9544
Hua		0.9947	0.9657	0.9886	0.9769
Huang		0.9804	0.9234	0.9913	0.6842
Ingerslev		0.964	0.927	0.9746	0.927
Morgan		0.9773	0.9164	0.9866	0.9334
Wong		0.8986	0.7769	0.9235	0.5224
Delker	13	0.964	0.9178	0.9829	0.8071
Donkin		0.9837	0.9691	0.9954	0.9607
Hua		0.9945	0.9699	0.9883	0.9769
Huang		0.9803	0.9225	0.9928	0.6845
Ingerslev		0.9636	0.9383	0.9828	0.9446
Morgan		0.977	0.9145	0.9858	0.934
Wong		0.898	0.7593	0.9241	0.5537
Delker	15	0.9635	0.9118	0.9839	0.806
Donkin		0.9835	0.9621	0.9955	0.9591
Hua		0.9945	0.9652	0.9884	0.9777
Huang		0.9802	0.9205	0.9928	0.6845
Ingerslev		0.9634	0.9315	0.984	0.9438
Morgan		0.9771	0.8807	0.9858	0.9332
Wong		0.8966	0.7409	0.9245	0.5356
mean rate		0.966114	0.861457	0.965443	0.789081

## Sheet: S7.tsRNA Assign rates by all re
Author	kmer length	bowtie -v 0 > Rsubread	bowtie -v 1 > Rsubread	hisat2 > Rsubread	STAR > Rsubread
Delker	5	0.0125094	0.00828489	0.0185809	0.00621819
Donkin		0.00747235	0.00742994	0.0088611	0.00801279
Hua		0.173583	0.156808	0.239601	0.136605
Huang		0.00204912	0.00159384	0.00234418	0.000836288
Ingerslev		0.0116794	0.0099284	0.0171974	0.0105828
Morgan		0.0219383	0.0186289	0.0319845	0.012635
Wong		0.00161849	0.000986969	0.00223135	0.000625946
Delker	7	0.0125099	0.00843882	0.0183719	0.00645494
Donkin		0.00745163	0.00772142	0.00886134	0.00823644
Hua		0.173582	0.159393	0.239616	0.139052
Huang		0.00204916	0.0016153	0.00234782	0.000845879
Ingerslev		0.011668	0.0102884	0.0166009	0.011291
Morgan		0.0219339	0.0190124	0.0319974	0.0130191
Wong		0.00160563	0.000989521	0.00222689	0.000638325
Delker	9	0.0126083	0.0100478	0.0197967	0.00715215
Donkin		0.00746153	0.00821195	0.0088784	0.0086449
Hua		0.173633	0.179812	0.240312	0.144339
Huang		0.00204875	0.00166201	0.00236441	0.000883475
Ingerslev		0.0116859	0.0120869	0.0184569	0.0127494
Morgan		0.0219463	0.0234997	0.0320791	0.0145144
Wong		0.00160959	0.00112521	0.00225839	0.000848129
Delker	11	0.0125473	0.0103913	0.0200935	0.00742175
Donkin		0.00746488	0.00833351	0.00887899	0.00874921
Hua		0.173651	0.182858	0.240649	0.145523
Huang		0.00204858	0.00169542	0.00236452	0.000912673
Ingerslev		0.0116908	0.0125393	0.0187173	0.0132201
Morgan		0.0219523	0.0241894	0.0321177	0.0147508
Wong		0.00160973	0.00116463	0.00226745	0.000971415
Delker	13	0.0125472	0.0105678	0.0203487	0.00751269
Donkin		0.00746014	0.00831753	0.00886708	0.00880628
Hua		0.173631	0.183652	0.240599	0.14552
Huang		0.00204845	0.00169351	0.0023685	0.000912843
Ingerslev		0.011688	0.0127108	0.0188886	0.0134914
Morgan		0.0219457	0.0241354	0.0320936	0.0147629
Wong		0.00160884	0.00114352	0.00226796	0.00103191
Delker	15	0.0125425	0.0104027	0.0203694	0.00750365
Donkin		0.00745884	0.0082585	0.00886743	0.00879425
Hua		0.173631	0.182776	0.240614	0.145647
Huang		0.00204837	0.00168991	0.00236852	0.000913453
Ingerslev		0.0116868	0.012635	0.0189121	0.0134879
Morgan		0.0219463	0.0232712	0.0320947	0.0147541
Wong		0.00160726	0.00112077	0.00226856	0.000992315
mean rate		0.0329871	0.0326455	0.046214	0.0266634

## Sheet: S8.Number_signif_tsRNA_transcri
Author	method	filtertype	bowtie0_5	bowtie1_5	hisat2_5	STAR_5	bowtie0_7	bowtie1_7	hisat2_7	STAR_7	bowtie0_9	bowtie1_9	hisat2_9	STAR_9	bowtie0_11	bowtie1_11	hisat2_11	STAR_11	bowtie0_13	bowtie1_13	hisat2_13	STAR_13	bowtie0_15	bowtie1_15	hisat2_15	STAR_15	mean	max	Mean by method
Delker_P	DESeq2	mean>5	89	96	84	65	99	105	91	75	102	117	90	84	101	122	90	86	101	121	95	84	99	118	94	89	95.7083	122	31.9762
Delker_C			17	18	19	20	19	14	19	24	17	17	20	20	18	18	12	18	17	19	13	21	18	19	11	20	17.8333	24
Huang			44	47	43	44	42	39	37	42	45	51	39	46	45	51	38	48	45	56	38	47	45	56	37	49	44.75	56
Hua			35	34	32	25	24	30	23	22	23	45	28	38	26	40	20	41	26	47	23	42	26	50	20	34	31.4167	50
Donkin			10	4	7	1	7	14	5	0	9	9	5	1	8	14	5	0	9	13	5	0	9	15	5	0	6.45833	15
Ingerslev_UT			11	11	12	8	14	9	25	10	15	13	23	13	14	15	18	12	14	12	21	11	13	16	19	11	14.1667	25
Ingerslev_TD			7	16	22	7	7	10	20	8	6	13	17	12	8	18	19	13	8	17	21	11	8	21	22	13	13.5	22
Delker_P		median>5	7	10	11	4	6	10	10	6	4	7	10	5	2	9	15	3	2	8	15	3	2	7	15	2	7.20833	15	2.50595
Delker_C			0	0	0	0	0	0	0	0	0	0	0	1	0	0	0	0	0	0	0	1	0	0	0	1	0.125	1
Huang			1	0	0	2	2	0	0	0	2	0	0	2	2	1	0	2	2	1	0	2	2	6	0	2	1.20833	6
Hua			6	3	7	5	5	2	6	6	5	1	7	11	5	2	7	13	5	1	7	13	5	8	7	13	6.25	13
Donkin			0	0	0	0	0	0	0	0	0	1	0	0	0	1	0	0	0	1	0	0	0	1	0	0	0.166667	1
Ingerslev_UT			0	1	0	0	0	0	0	0	0	0	1	0	0	0	0	0	0	0	1	0	0	0	1	0	0.166667	1
Ingerslev_TD			3	2	4	1	1	1	3	2	1	3	3	3	3	2	2	3	3	3	2	3	3	3	2	2	2.41667	4
Delker_P	edgeR	mean>5	0	0	0	0	0	0	0	0	0	0	0	0	0	0	0	0	0	0	0	0	0	0	0	0	0	0	0.380952
Delker_C			0	0	0	0	0	0	0	0	0	0	0	0	0	0	0	0	0	0	0	0	0	0	0	0	0	0
Huang			0	0	0	0	0	0	0	0	0	0	0	0	0	0	0	0	0	0	0	0	0	0	0	0	0	0
Hua			2	2	2	2	2	2	0	0	0	0	0	1	3	2	3	3	3	0	5	4	5	8	6	7	2.58333	8
Donkin			0	0	0	0	0	0	0	0	0	0	0	0	0	0	0	0	0	0	0	0	0	0	0	0	0	0
Ingerslev_UT			0	0	0	0	0	0	0	0	0	0	0	0	0	0	0	0	0	0	0	0	0	0	0	0	0	0
Ingerslev_TD			0	0	0	0	1	1	0	0	0	0	0	0	0	0	0	0	0	0	0	0	0	0	0	0	0.0833333	1
Delker_P		median>5	0	0	0	0	0	0	0	0	0	0	0	0	0	0	0	0	0	0	0	0	0	0	0	0	0	0	0.482143
Delker_C			0	0	0	0	0	0	0	0	0	0	0	0	0	0	0	0	0	0	0	0	0	0	0	0	0	0
Huang			0	0	0	0	0	0	0	0	0	0	0	0	0	0	0	0	0	0	0	0	0	0	0	0	0	0
Hua			2	3	3	2	3	3	0	2	0	0	0	1	2	4	3	3	3	4	5	4	5	10	11	6	3.29167	11
Donkin			0	0	0	0	0	0	0	0	0	0	0	0	0	0	0	0	0	0	0	0	0	0	0	0	0	0
Ingerslev_UT			0	0	0	0	0	0	0	0	0	0	0	0	0	0	0	0	0	0	0	0	0	0	0	0	0	0
Ingerslev_TD			0	0	0	0	1	1	0	0	0	0	0	0	0	0	0	0	0	0	0	0	0	0	0	0	0.0833333	1
Delker_P	limma	mean>5	0	0	0	0	0	0	0	0	0	0	0	0	0	0	0	0	0	0	0	0	0	0	0	0	0	0	0.392857
Delker_C			0	0	0	0	0	0	0	0	0	0	0	0	0	0	0	0	0	0	0	0	1	0	0	0	0.0416667	1
Huang			0	0	0	0	0	0	0	0	0	0	0	0	0	0	0	0	0	0	0	0	0	0	0	0	0	0
Hua			0	0	0	0	0	0	1	0	1	1	1	4	2	2	2	2	2	2	4	4	8	9	10	10	2.70833	10
Donkin			0	0	0	0	0	0	0	0	0	0	0	0	0	0	0	0	0	0	0	0	0	0	0	0	0	0
Ingerslev_UT			0	0	0	0	0	0	0	0	0	0	0	0	0	0	0	0	0	0	0	0	0	0	0	0	0	0
Ingerslev_TD			0	0	0	0	0	0	0	0	0	0	0	0	0	0	0	0	0	0	0	0	0	0	0	0	0	0
Delker_P		median>5	0	0	0	0	0	0	0	0	0	0	0	0	0	0	0	0	0	0	0	0	0	0	0	0	0	0	0.446429
Delker_C			0	0	0	0	0	0	0	0	0	0	0	0	0	0	0	0	0	0	0	0	1	0	0	0	0.0416667	1
Huang			0	0	0	0	0	0	0	0	0	0	0	0	0	0	0	0	0	0	0	0	0	0	0	0	0	0
Hua			0	0	0	0	0	0	1	0	1	1	1	4	2	2	2	2	2	2	6	5	9	11	14	9	3.08333	14
Donkin			0	0	0	0	0	0	0	0	0	0	0	0	0	0	0	0	0	0	0	0	0	0	0	0	0	0
Ingerslev_UT			0	0	0	0	0	0	0	0	0	0	0	0	0	0	0	0	0	0	0	0	0	0	0	0	0	0
Ingerslev_TD			0	0	0	0	0	0	0	0	0	0	0	0	0	0	0	0	0	0	0	0	0	0	0	0	0	0
Mean for all			5.57143	5.88095	5.85714	4.42857	5.54762	5.7381	5.7381	4.69048	5.5	6.64286	5.83333	5.85714	5.7381	7.21429	5.61905	5.92857	5.7619	7.30952	6.21429	6.07143	6.16667	8.52381	6.52381	6.38095
Mean by method	DESeq2		16.4286	17.2857	17.2143	13	16.1429	16.7143	17.0714	13.9286	16.3571	19.7857	17.3571	16.8571	16.5714	20.9286	16.1429	17.0714	16.5714	21.3571	17.2143	17	16.4286	22.8571	16.6429	16.8571
	edgeR		0.285714	0.357143	0.357143	0.285714	0.5	0.5	0	0.142857	0	0	0	0.142857	0.357143	0.428571	0.428571	0.428571	0.428571	0.285714	0.714286	0.571429	0.714286	1.28571	1.21429	0.928571
	limma		0	0	0	0	0	0	0.142857	0	0.142857	0.142857	0.142857	0.571429	0.285714	0.285714	0.285714	0.285714	0.285714	0.285714	0.714286	0.642857	1.35714	1.42857	1.71429	1.35714
Mean by filtering	mean>5		10.2381	10.8571	10.5238	8.19048	10.2381	10.6667	10.5238	8.61905	10.381	12.6667	10.619	10.4286	10.7143	13.4286	9.85714	10.619	10.7143	13.6667	10.7143	10.6667	11.0476	14.8571	10.6667	11.0952
	median>5		0.904762	0.904762	1.19048	0.666667	0.857143	0.809524	0.952381	0.761905	0.619048	0.619048	1.04762	1.28571	0.761905	1	1.38095	1.2381	0.809524	0.952381	1.71429	1.47619	1.28571	2.19048	2.38095	1.66667
Mean by method and by filtering	DESeq2	mean>5	30.4286	32.2857	31.2857	24.2857	30.2857	31.5714	31.4286	25.8571	31	37.8571	31.7143	30.5714	31.4286	39.7143	28.8571	31.1429	31.4286	40.7143	30.8571	30.8571	31.1429	42.1429	29.7143	30.8571
		median>5	2.42857	2.28571	3.14286	1.71429	2	1.85714	2.71429	2	1.71429	1.71429	3	3.14286	1.71429	2.14286	3.42857	3	1.71429	2	3.57143	3.14286	1.71429	3.57143	3.57143	2.85714
	edgeR	mean>5	0.285714	0.285714	0.285714	0.285714	0.428571	0.428571	0	0	0	0	0	0.142857	0.428571	0.285714	0.428571	0.428571	0.428571	0	0.714286	0.571429	0.714286	1.14286	0.857143	1
		median>5	0.285714	0.428571	0.428571	0.285714	0.571429	0.571429	0	0.285714	0	0	0	0.142857	0.285714	0.571429	0.428571	0.428571	0.428571	0.571429	0.714286	0.571429	0.714286	1.42857	1.57143	0.857143
	limma	mean>5	0	0	0	0	0	0	0.142857	0	0.142857	0.142857	0.142857	0.571429	0.285714	0.285714	0.285714	0.285714	0.285714	0.285714	0.571429	0.571429	1.28571	1.28571	1.42857	1.42857
		median>5	0	0	0	0	0	0	0.142857	0	0.142857	0.142857	0.142857	0.571429	0.285714	0.285714	0.285714	0.285714	0.285714	0.285714	0.857143	0.714286	1.42857	1.57143	2	1.28571

## Sheet: S9.Hobotnica score tsRNA
Author	Pipeline	method	filtertype	Hobot_pval	Hobot_padj
Delker_C	bowtie0_11	DESeq2	mean	0.54	0.57
Delker_C	bowtie0_11	DESeq2	median	0	0
Delker_C	bowtie0_11	edgeR	mean	0	0
Delker_C	bowtie0_11	edgeR	median	0	0
Delker_C	bowtie0_11	limma	mean	0	0
Delker_C	bowtie0_11	limma	median	0	0
Delker_C	bowtie0_13	DESeq2	mean	0.54	0.56
Delker_C	bowtie0_13	DESeq2	median	0	0
Delker_C	bowtie0_13	edgeR	mean	0	0
Delker_C	bowtie0_13	edgeR	median	0	0
Delker_C	bowtie0_13	limma	mean	0	0
Delker_C	bowtie0_13	limma	median	0	0
Delker_C	bowtie0_15	DESeq2	mean	0.54	0.56
Delker_C	bowtie0_15	DESeq2	median	0	0
Delker_C	bowtie0_15	edgeR	mean	0	0
Delker_C	bowtie0_15	edgeR	median	0	0
Delker_C	bowtie0_15	limma	mean	0	0
Delker_C	bowtie0_15	limma	median	0	0
Delker_C	bowtie0_5	DESeq2	mean	0.53	0.53
Delker_C	bowtie0_5	DESeq2	median	0	0
Delker_C	bowtie0_5	edgeR	mean	0	0
Delker_C	bowtie0_5	edgeR	median	0	0
Delker_C	bowtie0_5	limma	mean	0	0
Delker_C	bowtie0_5	limma	median	0	0
Delker_C	bowtie0_7	DESeq2	mean	0.55	0.56
Delker_C	bowtie0_7	DESeq2	median	0	0
Delker_C	bowtie0_7	edgeR	mean	0	0
Delker_C	bowtie0_7	edgeR	median	0	0
Delker_C	bowtie0_7	limma	mean	0	0
Delker_C	bowtie0_7	limma	median	0	0
Delker_C	bowtie0_9	DESeq2	mean	0.6	0.68
Delker_C	bowtie0_9	DESeq2	median	0	0
Delker_C	bowtie0_9	edgeR	mean	0	0
Delker_C	bowtie0_9	edgeR	median	0	0
Delker_C	bowtie0_9	limma	mean	0	0
Delker_C	bowtie0_9	limma	median	0	0
Delker_C	bowtie1_11	DESeq2	mean	0.55	0.55
Delker_C	bowtie1_11	DESeq2	median	0	0
Delker_C	bowtie1_11	edgeR	mean	0	0
Delker_C	bowtie1_11	edgeR	median	0	0
Delker_C	bowtie1_11	limma	mean	0	0
Delker_C	bowtie1_11	limma	median	0	0
Delker_C	bowtie1_13	DESeq2	mean	0.53	0.55
Delker_C	bowtie1_13	DESeq2	median	0	0
Delker_C	bowtie1_13	edgeR	mean	0	0
Delker_C	bowtie1_13	edgeR	median	0	0
Delker_C	bowtie1_13	limma	mean	0	0
Delker_C	bowtie1_13	limma	median	0	0
Delker_C	bowtie1_15	DESeq2	mean	0.55	0.57
Delker_C	bowtie1_15	DESeq2	median	0	0
Delker_C	bowtie1_15	edgeR	mean	0	0
Delker_C	bowtie1_15	edgeR	median	0	0
Delker_C	bowtie1_15	limma	mean	0	0
Delker_C	bowtie1_15	limma	median	0	0
Delker_C	bowtie1_5	DESeq2	mean	0.53	0.53
Delker_C	bowtie1_5	DESeq2	median	0	0
Delker_C	bowtie1_5	edgeR	mean	0	0
Delker_C	bowtie1_5	edgeR	median	0	0
Delker_C	bowtie1_5	limma	mean	0	0
Delker_C	bowtie1_5	limma	median	0	0
Delker_C	bowtie1_7	DESeq2	mean	0.54	0.51
Delker_C	bowtie1_7	DESeq2	median	0	0
Delker_C	bowtie1_7	edgeR	mean	0	0
Delker_C	bowtie1_7	edgeR	median	0	0
Delker_C	bowtie1_7	limma	mean	0	0
Delker_C	bowtie1_7	limma	median	0	0
Delker_C	bowtie1_9	DESeq2	mean	0.54	0.55
Delker_C	bowtie1_9	DESeq2	median	0	0
Delker_C	bowtie1_9	edgeR	mean	0	0
Delker_C	bowtie1_9	edgeR	median	0	0
Delker_C	bowtie1_9	limma	mean	0	0
Delker_C	bowtie1_9	limma	median	0	0
Delker_C	hisat2_11	DESeq2	mean	0.55	0.54
Delker_C	hisat2_11	DESeq2	median	0	0
Delker_C	hisat2_11	edgeR	mean	0	0
Delker_C	hisat2_11	edgeR	median	0	0
Delker_C	hisat2_11	limma	mean	0	0
Delker_C	hisat2_11	limma	median	0	0
Delker_C	hisat2_13	DESeq2	mean	0.55	0.55
Delker_C	hisat2_13	DESeq2	median	0	0
Delker_C	hisat2_13	edgeR	mean	0	0
Delker_C	hisat2_13	edgeR	median	0	0
Delker_C	hisat2_13	limma	mean	0	0
Delker_C	hisat2_13	limma	median	0	0
Delker_C	hisat2_15	DESeq2	mean	0.55	0.54
Delker_C	hisat2_15	DESeq2	median	0	0
Delker_C	hisat2_15	edgeR	mean	0	0
Delker_C	hisat2_15	edgeR	median	0	0
Delker_C	hisat2_15	limma	mean	0	0
Delker_C	hisat2_15	limma	median	0	0
Delker_C	hisat2_5	DESeq2	mean	0.56	0.54
Delker_C	hisat2_5	DESeq2	median	0	0
Delker_C	hisat2_5	edgeR	mean	0	0
Delker_C	hisat2_5	edgeR	median	0	0
Delker_C	hisat2_5	limma	mean	0	0
Delker_C	hisat2_5	limma	median	0	0
Delker_C	hisat2_7	DESeq2	mean	0.53	0.51
Delker_C	hisat2_7	DESeq2	median	0	0
Delker_C	hisat2_7	edgeR	mean	0	0
Delker_C	hisat2_7	edgeR	median	0	0
Delker_C	hisat2_7	limma	mean	0	0
Delker_C	hisat2_7	limma	median	0	0
Delker_C	hisat2_9	DESeq2	mean	0.54	0.53
Delker_C	hisat2_9	DESeq2	median	0	0
Delker_C	hisat2_9	edgeR	mean	0	0
Delker_C	hisat2_9	edgeR	median	0	0
Delker_C	hisat2_9	limma	mean	0	0
Delker_C	hisat2_9	limma	median	0	0
Delker_C	STAR_11	DESeq2	mean	0.54	0.55
Delker_C	STAR_11	DESeq2	median	0	0
Delker_C	STAR_11	edgeR	mean	0	0
Delker_C	STAR_11	edgeR	median	0	0
Delker_C	STAR_11	limma	mean	0	0
Delker_C	STAR_11	limma	median	0	0
Delker_C	STAR_13	DESeq2	mean	0.54	0.54
Delker_C	STAR_13	DESeq2	median	0.61	0.5
Delker_C	STAR_13	edgeR	mean	0	0
Delker_C	STAR_13	edgeR	median	0	0
Delker_C	STAR_13	limma	mean	0	0
Delker_C	STAR_13	limma	median	0	0
Delker_C	STAR_15	DESeq2	mean	0.54	0.55
Delker_C	STAR_15	DESeq2	median	0.6	0.5
Delker_C	STAR_15	edgeR	mean	0	0
Delker_C	STAR_15	edgeR	median	0	0
Delker_C	STAR_15	limma	mean	0	0
Delker_C	STAR_15	limma	median	0	0
Delker_C	STAR_5	DESeq2	mean	0.54	0.54
Delker_C	STAR_5	DESeq2	median	0	0
Delker_C	STAR_5	edgeR	mean	0	0
Delker_C	STAR_5	edgeR	median	0	0
Delker_C	STAR_5	limma	mean	0	0
Delker_C	STAR_5	limma	median	0	0
Delker_C	STAR_7	DESeq2	mean	0.53	0.52
Delker_C	STAR_7	DESeq2	median	0	0
Delker_C	STAR_7	edgeR	mean	0	0
Delker_C	STAR_7	edgeR	median	0	0
Delker_C	STAR_7	limma	mean	0	0
Delker_C	STAR_7	limma	median	0	0
Delker_C	STAR_9	DESeq2	mean	0.56	0.54
Delker_C	STAR_9	DESeq2	median	0.65	0.5
Delker_C	STAR_9	edgeR	mean	0	0
Delker_C	STAR_9	edgeR	median	0	0
Delker_C	STAR_9	limma	mean	0.61	0.5
Delker_C	STAR_9	limma	median	0.59	0.5
Delker_P	bowtie0_11	DESeq2	mean	0.54	0.54
Delker_P	bowtie0_11	DESeq2	median	0.59	0.49
Delker_P	bowtie0_11	edgeR	mean	0	0
Delker_P	bowtie0_11	edgeR	median	0	0
Delker_P	bowtie0_11	limma	mean	0	0
Delker_P	bowtie0_11	limma	median	0	0
Delker_P	bowtie0_13	DESeq2	mean	0.54	0.55
Delker_P	bowtie0_13	DESeq2	median	0.59	0.49
Delker_P	bowtie0_13	edgeR	mean	0	0
Delker_P	bowtie0_13	edgeR	median	0	0
Delker_P	bowtie0_13	limma	mean	0	0
Delker_P	bowtie0_13	limma	median	0	0
Delker_P	bowtie0_15	DESeq2	mean	0.53	0.54
Delker_P	bowtie0_15	DESeq2	median	0.59	0.49
Delker_P	bowtie0_15	edgeR	mean	0	0
Delker_P	bowtie0_15	edgeR	median	0	0
Delker_P	bowtie0_15	limma	mean	0	0
Delker_P	bowtie0_15	limma	median	0	0
Delker_P	bowtie0_5	DESeq2	mean	0.52	0.52
Delker_P	bowtie0_5	DESeq2	median	0.56	0.57
Delker_P	bowtie0_5	edgeR	mean	0	0
Delker_P	bowtie0_5	edgeR	median	0	0
Delker_P	bowtie0_5	limma	mean	0	0
Delker_P	bowtie0_5	limma	median	0	0
Delker_P	bowtie0_7	DESeq2	mean	0.52	0.53
Delker_P	bowtie0_7	DESeq2	median	0.59	0.58
Delker_P	bowtie0_7	edgeR	mean	0	0
Delker_P	bowtie0_7	edgeR	median	0	0
Delker_P	bowtie0_7	limma	mean	0	0
Delker_P	bowtie0_7	limma	median	0	0
Delker_P	bowtie0_9	DESeq2	mean	0.53	0.54
Delker_P	bowtie0_9	DESeq2	median	0.59	0.59
Delker_P	bowtie0_9	edgeR	mean	0	0
Delker_P	bowtie0_9	edgeR	median	0	0
Delker_P	bowtie0_9	limma	mean	0	0
Delker_P	bowtie0_9	limma	median	0	0
Delker_P	bowtie1_11	DESeq2	mean	0.54	0.54
Delker_P	bowtie1_11	DESeq2	median	0.57	0.57
Delker_P	bowtie1_11	edgeR	mean	0	0
Delker_P	bowtie1_11	edgeR	median	0	0
Delker_P	bowtie1_11	limma	mean	0	0
Delker_P	bowtie1_11	limma	median	0	0
Delker_P	bowtie1_13	DESeq2	mean	0.52	0.52
Delker_P	bowtie1_13	DESeq2	median	0.57	0.55
Delker_P	bowtie1_13	edgeR	mean	0	0
Delker_P	bowtie1_13	edgeR	median	0	0
Delker_P	bowtie1_13	limma	mean	0	0
Delker_P	bowtie1_13	limma	median	0	0
Delker_P	bowtie1_15	DESeq2	mean	0.53	0.53
Delker_P	bowtie1_15	DESeq2	median	0.58	0.55
Delker_P	bowtie1_15	edgeR	mean	0	0
Delker_P	bowtie1_15	edgeR	median	0	0
Delker_P	bowtie1_15	limma	mean	0	0
Delker_P	bowtie1_15	limma	median	0	0
Delker_P	bowtie1_5	DESeq2	mean	0.52	0.52
Delker_P	bowtie1_5	DESeq2	median	0.57	0.6
Delker_P	bowtie1_5	edgeR	mean	0	0
Delker_P	bowtie1_5	edgeR	median	0	0
Delker_P	bowtie1_5	limma	mean	0	0
Delker_P	bowtie1_5	limma	median	0	0
Delker_P	bowtie1_7	DESeq2	mean	0.53	0.53
Delker_P	bowtie1_7	DESeq2	median	0.59	0.57
Delker_P	bowtie1_7	edgeR	mean	0	0
Delker_P	bowtie1_7	edgeR	median	0	0
Delker_P	bowtie1_7	limma	mean	0	0
Delker_P	bowtie1_7	limma	median	0	0
Delker_P	bowtie1_9	DESeq2	mean	0.53	0.53
Delker_P	bowtie1_9	DESeq2	median	0.57	0.57
Delker_P	bowtie1_9	edgeR	mean	0	0
Delker_P	bowtie1_9	edgeR	median	0	0
Delker_P	bowtie1_9	limma	mean	0	0
Delker_P	bowtie1_9	limma	median	0	0
Delker_P	hisat2_11	DESeq2	mean	0.54	0.54
Delker_P	hisat2_11	DESeq2	median	0.58	0.6
Delker_P	hisat2_11	edgeR	mean	0	0
Delker_P	hisat2_11	edgeR	median	0	0
Delker_P	hisat2_11	limma	mean	0	0
Delker_P	hisat2_11	limma	median	0	0
Delker_P	hisat2_13	DESeq2	mean	0.53	0.54
Delker_P	hisat2_13	DESeq2	median	0.58	0.59
Delker_P	hisat2_13	edgeR	mean	0	0
Delker_P	hisat2_13	edgeR	median	0	0
Delker_P	hisat2_13	limma	mean	0	0
Delker_P	hisat2_13	limma	median	0	0
Delker_P	hisat2_15	DESeq2	mean	0.53	0.53
Delker_P	hisat2_15	DESeq2	median	0.59	0.59
Delker_P	hisat2_15	edgeR	mean	0	0
Delker_P	hisat2_15	edgeR	median	0	0
Delker_P	hisat2_15	limma	mean	0	0
Delker_P	hisat2_15	limma	median	0	0
Delker_P	hisat2_5	DESeq2	mean	0.54	0.55
Delker_P	hisat2_5	DESeq2	median	0.61	0.59
Delker_P	hisat2_5	edgeR	mean	0	0
Delker_P	hisat2_5	edgeR	median	0	0
Delker_P	hisat2_5	limma	mean	0	0
Delker_P	hisat2_5	limma	median	0	0
Delker_P	hisat2_7	DESeq2	mean	0.53	0.54
Delker_P	hisat2_7	DESeq2	median	0.58	0.61
Delker_P	hisat2_7	edgeR	mean	0	0
Delker_P	hisat2_7	edgeR	median	0	0
Delker_P	hisat2_7	limma	mean	0	0
Delker_P	hisat2_7	limma	median	0	0
Delker_P	hisat2_9	DESeq2	mean	0.55	0.54
Delker_P	hisat2_9	DESeq2	median	0.6	0.61
Delker_P	hisat2_9	edgeR	mean	0	0
Delker_P	hisat2_9	edgeR	median	0	0
Delker_P	hisat2_9	limma	mean	0	0
Delker_P	hisat2_9	limma	median	0	0
Delker_P	STAR_11	DESeq2	mean	0.54	0.53
Delker_P	STAR_11	DESeq2	median	0.6	0.58
Delker_P	STAR_11	edgeR	mean	0	0
Delker_P	STAR_11	edgeR	median	0	0
Delker_P	STAR_11	limma	mean	0	0
Delker_P	STAR_11	limma	median	0	0
Delker_P	STAR_13	DESeq2	mean	0.53	0.53
Delker_P	STAR_13	DESeq2	median	0.6	0.58
Delker_P	STAR_13	edgeR	mean	0	0
Delker_P	STAR_13	edgeR	median	0	0
Delker_P	STAR_13	limma	mean	0	0
Delker_P	STAR_13	limma	median	0	0
Delker_P	STAR_15	DESeq2	mean	0.53	0.52
Delker_P	STAR_15	DESeq2	median	0.62	0.54
Delker_P	STAR_15	edgeR	mean	0	0
Delker_P	STAR_15	edgeR	median	0	0
Delker_P	STAR_15	limma	mean	0	0
Delker_P	STAR_15	limma	median	0	0
Delker_P	STAR_5	DESeq2	mean	0.53	0.53
Delker_P	STAR_5	DESeq2	median	0.59	0.61
Delker_P	STAR_5	edgeR	mean	0	0
Delker_P	STAR_5	edgeR	median	0	0
Delker_P	STAR_5	limma	mean	0	0
Delker_P	STAR_5	limma	median	0	0
Delker_P	STAR_7	DESeq2	mean	0.53	0.53
Delker_P	STAR_7	DESeq2	median	0.61	0.61
Delker_P	STAR_7	edgeR	mean	0	0
Delker_P	STAR_7	edgeR	median	0	0
Delker_P	STAR_7	limma	mean	0	0
Delker_P	STAR_7	limma	median	0	0
Delker_P	STAR_9	DESeq2	mean	0.53	0.53
Delker_P	STAR_9	DESeq2	median	0.6	0.57
Delker_P	STAR_9	edgeR	mean	0	0
Delker_P	STAR_9	edgeR	median	0	0
Delker_P	STAR_9	limma	mean	0	0
Delker_P	STAR_9	limma	median	0	0
Donkin	bowtie0_11	DESeq2	mean	0.55	0.5
Donkin	bowtie0_11	DESeq2	median	0	0
Donkin	bowtie0_11	edgeR	mean	0	0
Donkin	bowtie0_11	edgeR	median	0	0
Donkin	bowtie0_11	limma	mean	0	0
Donkin	bowtie0_11	limma	median	0	0
Donkin	bowtie0_13	DESeq2	mean	0.55	0.51
Donkin	bowtie0_13	DESeq2	median	0	0
Donkin	bowtie0_13	edgeR	mean	0	0
Donkin	bowtie0_13	edgeR	median	0	0
Donkin	bowtie0_13	limma	mean	0	0
Donkin	bowtie0_13	limma	median	0	0
Donkin	bowtie0_15	DESeq2	mean	0.56	0.51
Donkin	bowtie0_15	DESeq2	median	0	0
Donkin	bowtie0_15	edgeR	mean	0	0
Donkin	bowtie0_15	edgeR	median	0	0
Donkin	bowtie0_15	limma	mean	0	0
Donkin	bowtie0_15	limma	median	0	0
Donkin	bowtie0_5	DESeq2	mean	0.59	0.56
Donkin	bowtie0_5	DESeq2	median	0	0
Donkin	bowtie0_5	edgeR	mean	0	0
Donkin	bowtie0_5	edgeR	median	0	0
Donkin	bowtie0_5	limma	mean	0	0
Donkin	bowtie0_5	limma	median	0	0
Donkin	bowtie0_7	DESeq2	mean	0.55	0.49
Donkin	bowtie0_7	DESeq2	median	0	0
Donkin	bowtie0_7	edgeR	mean	0	0
Donkin	bowtie0_7	edgeR	median	0	0
Donkin	bowtie0_7	limma	mean	0	0
Donkin	bowtie0_7	limma	median	0	0
Donkin	bowtie0_9	DESeq2	mean	0.54	0.51
Donkin	bowtie0_9	DESeq2	median	0	0
Donkin	bowtie0_9	edgeR	mean	0	0
Donkin	bowtie0_9	edgeR	median	0	0
Donkin	bowtie0_9	limma	mean	0	0
Donkin	bowtie0_9	limma	median	0	0
Donkin	bowtie1_11	DESeq2	mean	0.54	0.52
Donkin	bowtie1_11	DESeq2	median	0.53	0.59
Donkin	bowtie1_11	edgeR	mean	0	0
Donkin	bowtie1_11	edgeR	median	0	0
Donkin	bowtie1_11	limma	mean	0	0
Donkin	bowtie1_11	limma	median	0	0
Donkin	bowtie1_13	DESeq2	mean	0.54	0.53
Donkin	bowtie1_13	DESeq2	median	0.58	0.59
Donkin	bowtie1_13	edgeR	mean	0	0
Donkin	bowtie1_13	edgeR	median	0	0
Donkin	bowtie1_13	limma	mean	0	0
Donkin	bowtie1_13	limma	median	0	0
Donkin	bowtie1_15	DESeq2	mean	0.58	0.53
Donkin	bowtie1_15	DESeq2	median	0.58	0.59
Donkin	bowtie1_15	edgeR	mean	0	0
Donkin	bowtie1_15	edgeR	median	0	0
Donkin	bowtie1_15	limma	mean	0	0
Donkin	bowtie1_15	limma	median	0	0
Donkin	bowtie1_5	DESeq2	mean	0.58	0.48
Donkin	bowtie1_5	DESeq2	median	0	0
Donkin	bowtie1_5	edgeR	mean	0	0
Donkin	bowtie1_5	edgeR	median	0	0
Donkin	bowtie1_5	limma	mean	0	0
Donkin	bowtie1_5	limma	median	0	0
Donkin	bowtie1_7	DESeq2	mean	0.57	0.54
Donkin	bowtie1_7	DESeq2	median	0	0
Donkin	bowtie1_7	edgeR	mean	0	0
Donkin	bowtie1_7	edgeR	median	0	0
Donkin	bowtie1_7	limma	mean	0	0
Donkin	bowtie1_7	limma	median	0	0
Donkin	bowtie1_9	DESeq2	mean	0.57	0.55
Donkin	bowtie1_9	DESeq2	median	0.55	0.59
Donkin	bowtie1_9	edgeR	mean	0	0
Donkin	bowtie1_9	edgeR	median	0	0
Donkin	bowtie1_9	limma	mean	0	0
Donkin	bowtie1_9	limma	median	0	0
Donkin	hisat2_11	DESeq2	mean	0.52	0.5
Donkin	hisat2_11	DESeq2	median	0	0
Donkin	hisat2_11	edgeR	mean	0	0
Donkin	hisat2_11	edgeR	median	0	0
Donkin	hisat2_11	limma	mean	0	0
Donkin	hisat2_11	limma	median	0	0
Donkin	hisat2_13	DESeq2	mean	0.52	0.5
Donkin	hisat2_13	DESeq2	median	0	0
Donkin	hisat2_13	edgeR	mean	0	0
Donkin	hisat2_13	edgeR	median	0	0
Donkin	hisat2_13	limma	mean	0	0
Donkin	hisat2_13	limma	median	0	0
Donkin	hisat2_15	DESeq2	mean	0.52	0.5
Donkin	hisat2_15	DESeq2	median	0	0
Donkin	hisat2_15	edgeR	mean	0	0
Donkin	hisat2_15	edgeR	median	0	0
Donkin	hisat2_15	limma	mean	0	0
Donkin	hisat2_15	limma	median	0	0
Donkin	hisat2_5	DESeq2	mean	0.56	0.51
Donkin	hisat2_5	DESeq2	median	0	0
Donkin	hisat2_5	edgeR	mean	0	0
Donkin	hisat2_5	edgeR	median	0	0
Donkin	hisat2_5	limma	mean	0	0
Donkin	hisat2_5	limma	median	0	0
Donkin	hisat2_7	DESeq2	mean	0.53	0.52
Donkin	hisat2_7	DESeq2	median	0	0
Donkin	hisat2_7	edgeR	mean	0	0
Donkin	hisat2_7	edgeR	median	0	0
Donkin	hisat2_7	limma	mean	0	0
Donkin	hisat2_7	limma	median	0	0
Donkin	hisat2_9	DESeq2	mean	0.52	0.52
Donkin	hisat2_9	DESeq2	median	0	0
Donkin	hisat2_9	edgeR	mean	0	0
Donkin	hisat2_9	edgeR	median	0	0
Donkin	hisat2_9	limma	mean	0	0
Donkin	hisat2_9	limma	median	0	0
Donkin	STAR_11	DESeq2	mean	0	0
Donkin	STAR_11	DESeq2	median	0	0
Donkin	STAR_11	edgeR	mean	0	0
Donkin	STAR_11	edgeR	median	0	0
Donkin	STAR_11	limma	mean	0	0
Donkin	STAR_11	limma	median	0	0
Donkin	STAR_13	DESeq2	mean	0	0
Donkin	STAR_13	DESeq2	median	0	0
Donkin	STAR_13	edgeR	mean	0	0
Donkin	STAR_13	edgeR	median	0	0
Donkin	STAR_13	limma	mean	0	0
Donkin	STAR_13	limma	median	0	0
Donkin	STAR_15	DESeq2	mean	0	0
Donkin	STAR_15	DESeq2	median	0	0
Donkin	STAR_15	edgeR	mean	0	0
Donkin	STAR_15	edgeR	median	0	0
Donkin	STAR_15	limma	mean	0	0
Donkin	STAR_15	limma	median	0	0
Donkin	STAR_5	DESeq2	mean	0.6	0.59
Donkin	STAR_5	DESeq2	median	0	0
Donkin	STAR_5	edgeR	mean	0	0
Donkin	STAR_5	edgeR	median	0	0
Donkin	STAR_5	limma	mean	0	0
Donkin	STAR_5	limma	median	0	0
Donkin	STAR_7	DESeq2	mean	0	0
Donkin	STAR_7	DESeq2	median	0	0
Donkin	STAR_7	edgeR	mean	0	0
Donkin	STAR_7	edgeR	median	0	0
Donkin	STAR_7	limma	mean	0	0
Donkin	STAR_7	limma	median	0	0
Donkin	STAR_9	DESeq2	mean	0.55	0.59
Donkin	STAR_9	DESeq2	median	0	0
Donkin	STAR_9	edgeR	mean	0	0
Donkin	STAR_9	edgeR	median	0	0
Donkin	STAR_9	limma	mean	0	0
Donkin	STAR_9	limma	median	0	0
Hua	bowtie0_11	DESeq2	mean	0.48	0.46
Hua	bowtie0_11	DESeq2	median	0.51	0.49
Hua	bowtie0_11	edgeR	mean	0.48	0.5
Hua	bowtie0_11	edgeR	median	0.5	0.5
Hua	bowtie0_11	limma	mean	0	0
Hua	bowtie0_11	limma	median	0	0
Hua	bowtie0_13	DESeq2	mean	0.49	0.47
Hua	bowtie0_13	DESeq2	median	0.52	0.5
Hua	bowtie0_13	edgeR	mean	0.49	0.5
Hua	bowtie0_13	edgeR	median	0.48	0.5
Hua	bowtie0_13	limma	mean	0	0
Hua	bowtie0_13	limma	median	0	0
Hua	bowtie0_15	DESeq2	mean	0.49	0.47
Hua	bowtie0_15	DESeq2	median	0.52	0.5
Hua	bowtie0_15	edgeR	mean	0.49	0.5
Hua	bowtie0_15	edgeR	median	0.48	0.5
Hua	bowtie0_15	limma	mean	0	0
Hua	bowtie0_15	limma	median	0	0
Hua	bowtie0_5	DESeq2	mean	0.47	0.46
Hua	bowtie0_5	DESeq2	median	0.51	0.47
Hua	bowtie0_5	edgeR	mean	0.48	0.5
Hua	bowtie0_5	edgeR	median	0.48	0.5
Hua	bowtie0_5	limma	mean	0	0
Hua	bowtie0_5	limma	median	0	0
Hua	bowtie0_7	DESeq2	mean	0.49	0.47
Hua	bowtie0_7	DESeq2	median	0.51	0.49
Hua	bowtie0_7	edgeR	mean	0.51	0.5
Hua	bowtie0_7	edgeR	median	0.5	0.48
Hua	bowtie0_7	limma	mean	0	0
Hua	bowtie0_7	limma	median	0	0
Hua	bowtie0_9	DESeq2	mean	0.48	0.47
Hua	bowtie0_9	DESeq2	median	0.54	0.49
Hua	bowtie0_9	edgeR	mean	0.49	0.5
Hua	bowtie0_9	edgeR	median	0.52	0.5
Hua	bowtie0_9	limma	mean	0	0
Hua	bowtie0_9	limma	median	0	0
Hua	bowtie1_11	DESeq2	mean	0.47	0.45
Hua	bowtie1_11	DESeq2	median	0.57	0.53
Hua	bowtie1_11	edgeR	mean	0	0
Hua	bowtie1_11	edgeR	median	0	0
Hua	bowtie1_11	limma	mean	0.59	0.24
Hua	bowtie1_11	limma	median	0.61	0.24
Hua	bowtie1_13	DESeq2	mean	0.46	0.44
Hua	bowtie1_13	DESeq2	median	0.56	0.24
Hua	bowtie1_13	edgeR	mean	0	0
Hua	bowtie1_13	edgeR	median	0	0
Hua	bowtie1_13	limma	mean	0.58	0.24
Hua	bowtie1_13	limma	median	0.61	0.24
Hua	bowtie1_15	DESeq2	mean	0.49	0.49
Hua	bowtie1_15	DESeq2	median	0.57	0.47
Hua	bowtie1_15	edgeR	mean	0.54	0.24
Hua	bowtie1_15	edgeR	median	0.53	0.24
Hua	bowtie1_15	limma	mean	0.59	0.52
Hua	bowtie1_15	limma	median	0.59	0.52
Hua	bowtie1_5	DESeq2	mean	0.49	0.48
Hua	bowtie1_5	DESeq2	median	0.58	0.5
Hua	bowtie1_5	edgeR	mean	0	0
Hua	bowtie1_5	edgeR	median	0	0
Hua	bowtie1_5	limma	mean	0.59	0.24
Hua	bowtie1_5	limma	median	0.61	0.24
Hua	bowtie1_7	DESeq2	mean	0.49	0.46
Hua	bowtie1_7	DESeq2	median	0.58	0.49
Hua	bowtie1_7	edgeR	mean	0	0
Hua	bowtie1_7	edgeR	median	0.53	0.49
Hua	bowtie1_7	limma	mean	0	0
Hua	bowtie1_7	limma	median	0	0
Hua	bowtie1_9	DESeq2	mean	0.48	0.46
Hua	bowtie1_9	DESeq2	median	0.58	0.24
Hua	bowtie1_9	edgeR	mean	0	0
Hua	bowtie1_9	edgeR	median	0	0
Hua	bowtie1_9	limma	mean	0.57	0.24
Hua	bowtie1_9	limma	median	0.6	0.24
Hua	hisat2_11	DESeq2	mean	0.47	0.48
Hua	hisat2_11	DESeq2	median	0.58	0.56
Hua	hisat2_11	edgeR	mean	0.52	0.55
Hua	hisat2_11	edgeR	median	0.56	0.55
Hua	hisat2_11	limma	mean	0.61	0.55
Hua	hisat2_11	limma	median	0.55	0.55
Hua	hisat2_13	DESeq2	mean	0.46	0.47
Hua	hisat2_13	DESeq2	median	0.57	0.56
Hua	hisat2_13	edgeR	mean	0.54	0.55
Hua	hisat2_13	edgeR	median	0.56	0.55
Hua	hisat2_13	limma	mean	0.62	0.55
Hua	hisat2_13	limma	median	0.59	0.55
Hua	hisat2_15	DESeq2	mean	0.47	0.47
Hua	hisat2_15	DESeq2	median	0.56	0.55
Hua	hisat2_15	edgeR	mean	0	0
Hua	hisat2_15	edgeR	median	0.56	0.58
Hua	hisat2_15	limma	mean	0.6	0.55
Hua	hisat2_15	limma	median	0.57	0.55
Hua	hisat2_5	DESeq2	mean	0.48	0.48
Hua	hisat2_5	DESeq2	median	0.55	0.55
Hua	hisat2_5	edgeR	mean	0.53	0.55
Hua	hisat2_5	edgeR	median	0.54	0.55
Hua	hisat2_5	limma	mean	0.59	0.55
Hua	hisat2_5	limma	median	0.56	0.55
Hua	hisat2_7	DESeq2	mean	0.5	0.52
Hua	hisat2_7	DESeq2	median	0.57	0.54
Hua	hisat2_7	edgeR	mean	0.51	0.55
Hua	hisat2_7	edgeR	median	0.51	0.56
Hua	hisat2_7	limma	mean	0.58	0.55
Hua	hisat2_7	limma	median	0.57	0.55
Hua	hisat2_9	DESeq2	mean	0.49	0.49
Hua	hisat2_9	DESeq2	median	0.57	0.55
Hua	hisat2_9	edgeR	mean	0.5	0.55
Hua	hisat2_9	edgeR	median	0.53	0.55
Hua	hisat2_9	limma	mean	0.6	0.55
Hua	hisat2_9	limma	median	0.54	0.55
Hua	STAR_11	DESeq2	mean	0.54	0.56
Hua	STAR_11	DESeq2	median	0.57	0.57
Hua	STAR_11	edgeR	mean	0.55	0.55
Hua	STAR_11	edgeR	median	0.52	0.55
Hua	STAR_11	limma	mean	0.64	0.54
Hua	STAR_11	limma	median	0.62	0.53
Hua	STAR_13	DESeq2	mean	0.54	0.55
Hua	STAR_13	DESeq2	median	0.57	0.58
Hua	STAR_13	edgeR	mean	0.55	0.53
Hua	STAR_13	edgeR	median	0.54	0.54
Hua	STAR_13	limma	mean	0.66	0.58
Hua	STAR_13	limma	median	0.63	0.56
Hua	STAR_15	DESeq2	mean	0.54	0.53
Hua	STAR_15	DESeq2	median	0.58	0.6
Hua	STAR_15	edgeR	mean	0.56	0.52
Hua	STAR_15	edgeR	median	0.58	0.52
Hua	STAR_15	limma	mean	0.64	0.6
Hua	STAR_15	limma	median	0.59	0.59
Hua	STAR_5	DESeq2	mean	0.48	0.5
Hua	STAR_5	DESeq2	median	0.53	0.51
Hua	STAR_5	edgeR	mean	0.49	0.51
Hua	STAR_5	edgeR	median	0.52	0.51
Hua	STAR_5	limma	mean	0.59	0.49
Hua	STAR_5	limma	median	0.58	0.56
Hua	STAR_7	DESeq2	mean	0.49	0.5
Hua	STAR_7	DESeq2	median	0.55	0.56
Hua	STAR_7	edgeR	mean	0.53	0.49
Hua	STAR_7	edgeR	median	0.5	0.49
Hua	STAR_7	limma	mean	0.56	0.49
Hua	STAR_7	limma	median	0.55	0.59
Hua	STAR_9	DESeq2	mean	0.54	0.55
Hua	STAR_9	DESeq2	median	0.54	0.53
Hua	STAR_9	edgeR	mean	0.5	0.49
Hua	STAR_9	edgeR	median	0.55	0.49
Hua	STAR_9	limma	mean	0.57	0.53
Hua	STAR_9	limma	median	0.57	0.55
Huang	bowtie0_11	DESeq2	mean	0.55	0.53
Huang	bowtie0_11	DESeq2	median	0.57	0.5
Huang	bowtie0_11	edgeR	mean	0	0
Huang	bowtie0_11	edgeR	median	0	0
Huang	bowtie0_11	limma	mean	0	0
Huang	bowtie0_11	limma	median	0	0
Huang	bowtie0_13	DESeq2	mean	0.55	0.53
Huang	bowtie0_13	DESeq2	median	0.57	0.5
Huang	bowtie0_13	edgeR	mean	0	0
Huang	bowtie0_13	edgeR	median	0	0
Huang	bowtie0_13	limma	mean	0	0
Huang	bowtie0_13	limma	median	0	0
Huang	bowtie0_15	DESeq2	mean	0.55	0.53
Huang	bowtie0_15	DESeq2	median	0.57	0.5
Huang	bowtie0_15	edgeR	mean	0	0
Huang	bowtie0_15	edgeR	median	0	0
Huang	bowtie0_15	limma	mean	0	0
Huang	bowtie0_15	limma	median	0	0
Huang	bowtie0_5	DESeq2	mean	0.54	0.54
Huang	bowtie0_5	DESeq2	median	0.52	0.5
Huang	bowtie0_5	edgeR	mean	0	0
Huang	bowtie0_5	edgeR	median	0	0
Huang	bowtie0_5	limma	mean	0	0
Huang	bowtie0_5	limma	median	0	0
Huang	bowtie0_7	DESeq2	mean	0.52	0.52
Huang	bowtie0_7	DESeq2	median	0.57	0.5
Huang	bowtie0_7	edgeR	mean	0	0
Huang	bowtie0_7	edgeR	median	0	0
Huang	bowtie0_7	limma	mean	0	0
Huang	bowtie0_7	limma	median	0	0
Huang	bowtie0_9	DESeq2	mean	0.55	0.53
Huang	bowtie0_9	DESeq2	median	0.57	0.5
Huang	bowtie0_9	edgeR	mean	0	0
Huang	bowtie0_9	edgeR	median	0	0
Huang	bowtie0_9	limma	mean	0	0
Huang	bowtie0_9	limma	median	0	0
Huang	bowtie1_11	DESeq2	mean	0.54	0.54
Huang	bowtie1_11	DESeq2	median	0.65	0.5
Huang	bowtie1_11	edgeR	mean	0	0
Huang	bowtie1_11	edgeR	median	0	0
Huang	bowtie1_11	limma	mean	0	0
Huang	bowtie1_11	limma	median	0	0
Huang	bowtie1_13	DESeq2	mean	0.56	0.56
Huang	bowtie1_13	DESeq2	median	0.66	0.5
Huang	bowtie1_13	edgeR	mean	0	0
Huang	bowtie1_13	edgeR	median	0	0
Huang	bowtie1_13	limma	mean	0	0
Huang	bowtie1_13	limma	median	0	0
Huang	bowtie1_15	DESeq2	mean	0.56	0.56
Huang	bowtie1_15	DESeq2	median	0.6	0.63
Huang	bowtie1_15	edgeR	mean	0	0
Huang	bowtie1_15	edgeR	median	0	0
Huang	bowtie1_15	limma	mean	0	0
Huang	bowtie1_15	limma	median	0	0
Huang	bowtie1_5	DESeq2	mean	0.55	0.55
Huang	bowtie1_5	DESeq2	median	0	0
Huang	bowtie1_5	edgeR	mean	0	0
Huang	bowtie1_5	edgeR	median	0	0
Huang	bowtie1_5	limma	mean	0	0
Huang	bowtie1_5	limma	median	0	0
Huang	bowtie1_7	DESeq2	mean	0.55	0.56
Huang	bowtie1_7	DESeq2	median	0	0
Huang	bowtie1_7	edgeR	mean	0	0
Huang	bowtie1_7	edgeR	median	0	0
Huang	bowtie1_7	limma	mean	0	0
Huang	bowtie1_7	limma	median	0	0
Huang	bowtie1_9	DESeq2	mean	0.54	0.54
Huang	bowtie1_9	DESeq2	median	0	0
Huang	bowtie1_9	edgeR	mean	0	0
Huang	bowtie1_9	edgeR	median	0	0
Huang	bowtie1_9	limma	mean	0	0
Huang	bowtie1_9	limma	median	0	0
Huang	hisat2_11	DESeq2	mean	0.59	0.59
Huang	hisat2_11	DESeq2	median	0	0
Huang	hisat2_11	edgeR	mean	0	0
Huang	hisat2_11	edgeR	median	0	0
Huang	hisat2_11	limma	mean	0	0
Huang	hisat2_11	limma	median	0	0
Huang	hisat2_13	DESeq2	mean	0.58	0.59
Huang	hisat2_13	DESeq2	median	0	0
Huang	hisat2_13	edgeR	mean	0	0
Huang	hisat2_13	edgeR	median	0	0
Huang	hisat2_13	limma	mean	0	0
Huang	hisat2_13	limma	median	0	0
Huang	hisat2_15	DESeq2	mean	0.58	0.6
Huang	hisat2_15	DESeq2	median	0	0
Huang	hisat2_15	edgeR	mean	0	0
Huang	hisat2_15	edgeR	median	0	0
Huang	hisat2_15	limma	mean	0	0
Huang	hisat2_15	limma	median	0	0
Huang	hisat2_5	DESeq2	mean	0.55	0.56
Huang	hisat2_5	DESeq2	median	0	0
Huang	hisat2_5	edgeR	mean	0	0
Huang	hisat2_5	edgeR	median	0	0
Huang	hisat2_5	limma	mean	0	0
Huang	hisat2_5	limma	median	0	0
Huang	hisat2_7	DESeq2	mean	0.56	0.57
Huang	hisat2_7	DESeq2	median	0	0
Huang	hisat2_7	edgeR	mean	0	0
Huang	hisat2_7	edgeR	median	0	0
Huang	hisat2_7	limma	mean	0	0
Huang	hisat2_7	limma	median	0	0
Huang	hisat2_9	DESeq2	mean	0.58	0.6
Huang	hisat2_9	DESeq2	median	0	0
Huang	hisat2_9	edgeR	mean	0	0
Huang	hisat2_9	edgeR	median	0	0
Huang	hisat2_9	limma	mean	0	0
Huang	hisat2_9	limma	median	0	0
Huang	STAR_11	DESeq2	mean	0.52	0.51
Huang	STAR_11	DESeq2	median	0.5	0.49
Huang	STAR_11	edgeR	mean	0	0
Huang	STAR_11	edgeR	median	0	0
Huang	STAR_11	limma	mean	0	0
Huang	STAR_11	limma	median	0	0
Huang	STAR_13	DESeq2	mean	0.5	0.51
Huang	STAR_13	DESeq2	median	0.52	0.49
Huang	STAR_13	edgeR	mean	0	0
Huang	STAR_13	edgeR	median	0	0
Huang	STAR_13	limma	mean	0	0
Huang	STAR_13	limma	median	0	0
Huang	STAR_15	DESeq2	mean	0.52	0.51
Huang	STAR_15	DESeq2	median	0.52	0.49
Huang	STAR_15	edgeR	mean	0	0
Huang	STAR_15	edgeR	median	0	0
Huang	STAR_15	limma	mean	0	0
Huang	STAR_15	limma	median	0	0
Huang	STAR_5	DESeq2	mean	0.51	0.51
Huang	STAR_5	DESeq2	median	0.48	0.49
Huang	STAR_5	edgeR	mean	0	0
Huang	STAR_5	edgeR	median	0	0
Huang	STAR_5	limma	mean	0	0
Huang	STAR_5	limma	median	0	0
Huang	STAR_7	DESeq2	mean	0.51	0.52
Huang	STAR_7	DESeq2	median	0	0
Huang	STAR_7	edgeR	mean	0	0
Huang	STAR_7	edgeR	median	0	0
Huang	STAR_7	limma	mean	0	0
Huang	STAR_7	limma	median	0	0
Huang	STAR_9	DESeq2	mean	0.52	0.52
Huang	STAR_9	DESeq2	median	0.52	0.56
Huang	STAR_9	edgeR	mean	0	0
Huang	STAR_9	edgeR	median	0	0
Huang	STAR_9	limma	mean	0	0
Huang	STAR_9	limma	median	0	0
Ingerslev_TD	bowtie0_11	DESeq2	mean	0.67	0.64
Ingerslev_TD	bowtie0_11	DESeq2	median	0.62	0.5
Ingerslev_TD	bowtie0_11	edgeR	mean	0	0
Ingerslev_TD	bowtie0_11	edgeR	median	0	0
Ingerslev_TD	bowtie0_11	limma	mean	0	0
Ingerslev_TD	bowtie0_11	limma	median	0	0
Ingerslev_TD	bowtie0_13	DESeq2	mean	0.66	0.66
Ingerslev_TD	bowtie0_13	DESeq2	median	0.62	0.51
Ingerslev_TD	bowtie0_13	edgeR	mean	0.45	0.53
Ingerslev_TD	bowtie0_13	edgeR	median	0.44	0.53
Ingerslev_TD	bowtie0_13	limma	mean	0	0
Ingerslev_TD	bowtie0_13	limma	median	0	0
Ingerslev_TD	bowtie0_15	DESeq2	mean	0.69	0.66
Ingerslev_TD	bowtie0_15	DESeq2	median	0.66	0.53
Ingerslev_TD	bowtie0_15	edgeR	mean	0.45	0.53
Ingerslev_TD	bowtie0_15	edgeR	median	0.44	0.53
Ingerslev_TD	bowtie0_15	limma	mean	0	0
Ingerslev_TD	bowtie0_15	limma	median	0	0
Ingerslev_TD	bowtie0_5	DESeq2	mean	0.62	0.45
Ingerslev_TD	bowtie0_5	DESeq2	median	0.66	0.44
Ingerslev_TD	bowtie0_5	edgeR	mean	0	0
Ingerslev_TD	bowtie0_5	edgeR	median	0	0
Ingerslev_TD	bowtie0_5	limma	mean	0	0
Ingerslev_TD	bowtie0_5	limma	median	0	0
Ingerslev_TD	bowtie0_7	DESeq2	mean	0.68	0.62
Ingerslev_TD	bowtie0_7	DESeq2	median	0.6	0.53
Ingerslev_TD	bowtie0_7	edgeR	mean	0	0
Ingerslev_TD	bowtie0_7	edgeR	median	0	0
Ingerslev_TD	bowtie0_7	limma	mean	0	0
Ingerslev_TD	bowtie0_7	limma	median	0	0
Ingerslev_TD	bowtie0_9	DESeq2	mean	0.67	0.64
Ingerslev_TD	bowtie0_9	DESeq2	median	0.61	0.53
Ingerslev_TD	bowtie0_9	edgeR	mean	0	0
Ingerslev_TD	bowtie0_9	edgeR	median	0	0
Ingerslev_TD	bowtie0_9	limma	mean	0	0
Ingerslev_TD	bowtie0_9	limma	median	0	0
Ingerslev_TD	bowtie1_11	DESeq2	mean	0.62	0.6
Ingerslev_TD	bowtie1_11	DESeq2	median	0.61	0.52
Ingerslev_TD	bowtie1_11	edgeR	mean	0	0
Ingerslev_TD	bowtie1_11	edgeR	median	0	0
Ingerslev_TD	bowtie1_11	limma	mean	0	0
Ingerslev_TD	bowtie1_11	limma	median	0	0
Ingerslev_TD	bowtie1_13	DESeq2	mean	0.6	0.66
Ingerslev_TD	bowtie1_13	DESeq2	median	0.61	0.51
Ingerslev_TD	bowtie1_13	edgeR	mean	0	0
Ingerslev_TD	bowtie1_13	edgeR	median	0	0
Ingerslev_TD	bowtie1_13	limma	mean	0	0
Ingerslev_TD	bowtie1_13	limma	median	0	0
Ingerslev_TD	bowtie1_15	DESeq2	mean	0.66	0.67
Ingerslev_TD	bowtie1_15	DESeq2	median	0.61	0.51
Ingerslev_TD	bowtie1_15	edgeR	mean	0	0
Ingerslev_TD	bowtie1_15	edgeR	median	0	0
Ingerslev_TD	bowtie1_15	limma	mean	0	0
Ingerslev_TD	bowtie1_15	limma	median	0	0
Ingerslev_TD	bowtie1_5	DESeq2	mean	0.61	0.55
Ingerslev_TD	bowtie1_5	DESeq2	median	0.65	0.48
Ingerslev_TD	bowtie1_5	edgeR	mean	0	0
Ingerslev_TD	bowtie1_5	edgeR	median	0	0
Ingerslev_TD	bowtie1_5	limma	mean	0	0
Ingerslev_TD	bowtie1_5	limma	median	0	0
Ingerslev_TD	bowtie1_7	DESeq2	mean	0.54	0.5
Ingerslev_TD	bowtie1_7	DESeq2	median	0.59	0.53
Ingerslev_TD	bowtie1_7	edgeR	mean	0	0
Ingerslev_TD	bowtie1_7	edgeR	median	0	0
Ingerslev_TD	bowtie1_7	limma	mean	0	0
Ingerslev_TD	bowtie1_7	limma	median	0	0
Ingerslev_TD	bowtie1_9	DESeq2	mean	0.6	0.66
Ingerslev_TD	bowtie1_9	DESeq2	median	0.55	0.51
Ingerslev_TD	bowtie1_9	edgeR	mean	0	0
Ingerslev_TD	bowtie1_9	edgeR	median	0	0
Ingerslev_TD	bowtie1_9	limma	mean	0	0
Ingerslev_TD	bowtie1_9	limma	median	0	0
Ingerslev_TD	hisat2_11	DESeq2	mean	0.56	0.57
Ingerslev_TD	hisat2_11	DESeq2	median	0.6	0.52
Ingerslev_TD	hisat2_11	edgeR	mean	0	0
Ingerslev_TD	hisat2_11	edgeR	median	0	0
Ingerslev_TD	hisat2_11	limma	mean	0	0
Ingerslev_TD	hisat2_11	limma	median	0	0
Ingerslev_TD	hisat2_13	DESeq2	mean	0.55	0.57
Ingerslev_TD	hisat2_13	DESeq2	median	0.59	0.52
Ingerslev_TD	hisat2_13	edgeR	mean	0	0
Ingerslev_TD	hisat2_13	edgeR	median	0	0
Ingerslev_TD	hisat2_13	limma	mean	0	0
Ingerslev_TD	hisat2_13	limma	median	0	0
Ingerslev_TD	hisat2_15	DESeq2	mean	0.57	0.58
Ingerslev_TD	hisat2_15	DESeq2	median	0.59	0.52
Ingerslev_TD	hisat2_15	edgeR	mean	0	0
Ingerslev_TD	hisat2_15	edgeR	median	0	0
Ingerslev_TD	hisat2_15	limma	mean	0	0
Ingerslev_TD	hisat2_15	limma	median	0	0
Ingerslev_TD	hisat2_5	DESeq2	mean	0.56	0.56
Ingerslev_TD	hisat2_5	DESeq2	median	0.63	0.57
Ingerslev_TD	hisat2_5	edgeR	mean	0	0
Ingerslev_TD	hisat2_5	edgeR	median	0	0
Ingerslev_TD	hisat2_5	limma	mean	0	0
Ingerslev_TD	hisat2_5	limma	median	0	0
Ingerslev_TD	hisat2_7	DESeq2	mean	0.57	0.58
Ingerslev_TD	hisat2_7	DESeq2	median	0.62	0.54
Ingerslev_TD	hisat2_7	edgeR	mean	0	0
Ingerslev_TD	hisat2_7	edgeR	median	0	0
Ingerslev_TD	hisat2_7	limma	mean	0	0
Ingerslev_TD	hisat2_7	limma	median	0	0
Ingerslev_TD	hisat2_9	DESeq2	mean	0.57	0.56
Ingerslev_TD	hisat2_9	DESeq2	median	0.58	0.51
Ingerslev_TD	hisat2_9	edgeR	mean	0	0
Ingerslev_TD	hisat2_9	edgeR	median	0	0
Ingerslev_TD	hisat2_9	limma	mean	0	0
Ingerslev_TD	hisat2_9	limma	median	0	0
Ingerslev_TD	STAR_11	DESeq2	mean	0.57	0.48
Ingerslev_TD	STAR_11	DESeq2	median	0.59	0.52
Ingerslev_TD	STAR_11	edgeR	mean	0	0
Ingerslev_TD	STAR_11	edgeR	median	0	0
Ingerslev_TD	STAR_11	limma	mean	0	0
Ingerslev_TD	STAR_11	limma	median	0	0
Ingerslev_TD	STAR_13	DESeq2	mean	0.55	0.46
Ingerslev_TD	STAR_13	DESeq2	median	0.59	0.52
Ingerslev_TD	STAR_13	edgeR	mean	0	0
Ingerslev_TD	STAR_13	edgeR	median	0	0
Ingerslev_TD	STAR_13	limma	mean	0	0
Ingerslev_TD	STAR_13	limma	median	0	0
Ingerslev_TD	STAR_15	DESeq2	mean	0.56	0.5
Ingerslev_TD	STAR_15	DESeq2	median	0.54	0.49
Ingerslev_TD	STAR_15	edgeR	mean	0	0
Ingerslev_TD	STAR_15	edgeR	median	0	0
Ingerslev_TD	STAR_15	limma	mean	0	0
Ingerslev_TD	STAR_15	limma	median	0	0
Ingerslev_TD	STAR_5	DESeq2	mean	0.6	0.59
Ingerslev_TD	STAR_5	DESeq2	median	0.75	0.53
Ingerslev_TD	STAR_5	edgeR	mean	0	0
Ingerslev_TD	STAR_5	edgeR	median	0	0
Ingerslev_TD	STAR_5	limma	mean	0	0
Ingerslev_TD	STAR_5	limma	median	0	0
Ingerslev_TD	STAR_7	DESeq2	mean	0.55	0.48
Ingerslev_TD	STAR_7	DESeq2	median	0.66	0.58
Ingerslev_TD	STAR_7	edgeR	mean	0	0
Ingerslev_TD	STAR_7	edgeR	median	0	0
Ingerslev_TD	STAR_7	limma	mean	0	0
Ingerslev_TD	STAR_7	limma	median	0	0
Ingerslev_TD	STAR_9	DESeq2	mean	0.65	0.56
Ingerslev_TD	STAR_9	DESeq2	median	0.65	0.52
Ingerslev_TD	STAR_9	edgeR	mean	0	0
Ingerslev_TD	STAR_9	edgeR	median	0	0
Ingerslev_TD	STAR_9	limma	mean	0	0
Ingerslev_TD	STAR_9	limma	median	0	0
Ingerslev_UT	bowtie0_11	DESeq2	mean	0.51	0.5
Ingerslev_UT	bowtie0_11	DESeq2	median	0	0
Ingerslev_UT	bowtie0_11	edgeR	mean	0	0
Ingerslev_UT	bowtie0_11	edgeR	median	0	0
Ingerslev_UT	bowtie0_11	limma	mean	0	0
Ingerslev_UT	bowtie0_11	limma	median	0	0
Ingerslev_UT	bowtie0_13	DESeq2	mean	0.51	0.5
Ingerslev_UT	bowtie0_13	DESeq2	median	0	0
Ingerslev_UT	bowtie0_13	edgeR	mean	0	0
Ingerslev_UT	bowtie0_13	edgeR	median	0	0
Ingerslev_UT	bowtie0_13	limma	mean	0	0
Ingerslev_UT	bowtie0_13	limma	median	0	0
Ingerslev_UT	bowtie0_15	DESeq2	mean	0.52	0.5
Ingerslev_UT	bowtie0_15	DESeq2	median	0	0
Ingerslev_UT	bowtie0_15	edgeR	mean	0	0
Ingerslev_UT	bowtie0_15	edgeR	median	0	0
Ingerslev_UT	bowtie0_15	limma	mean	0	0
Ingerslev_UT	bowtie0_15	limma	median	0	0
Ingerslev_UT	bowtie0_5	DESeq2	mean	0.54	0.55
Ingerslev_UT	bowtie0_5	DESeq2	median	0	0
Ingerslev_UT	bowtie0_5	edgeR	mean	0	0
Ingerslev_UT	bowtie0_5	edgeR	median	0	0
Ingerslev_UT	bowtie0_5	limma	mean	0	0
Ingerslev_UT	bowtie0_5	limma	median	0	0
Ingerslev_UT	bowtie0_7	DESeq2	mean	0.52	0.51
Ingerslev_UT	bowtie0_7	DESeq2	median	0	0
Ingerslev_UT	bowtie0_7	edgeR	mean	0	0
Ingerslev_UT	bowtie0_7	edgeR	median	0	0
Ingerslev_UT	bowtie0_7	limma	mean	0	0
Ingerslev_UT	bowtie0_7	limma	median	0	0
Ingerslev_UT	bowtie0_9	DESeq2	mean	0.53	0.56
Ingerslev_UT	bowtie0_9	DESeq2	median	0	0
Ingerslev_UT	bowtie0_9	edgeR	mean	0	0
Ingerslev_UT	bowtie0_9	edgeR	median	0	0
Ingerslev_UT	bowtie0_9	limma	mean	0	0
Ingerslev_UT	bowtie0_9	limma	median	0	0
Ingerslev_UT	bowtie1_11	DESeq2	mean	0.52	0.54
Ingerslev_UT	bowtie1_11	DESeq2	median	0	0
Ingerslev_UT	bowtie1_11	edgeR	mean	0	0
Ingerslev_UT	bowtie1_11	edgeR	median	0	0
Ingerslev_UT	bowtie1_11	limma	mean	0	0
Ingerslev_UT	bowtie1_11	limma	median	0	0
Ingerslev_UT	bowtie1_13	DESeq2	mean	0.53	0.54
Ingerslev_UT	bowtie1_13	DESeq2	median	0	0
Ingerslev_UT	bowtie1_13	edgeR	mean	0	0
Ingerslev_UT	bowtie1_13	edgeR	median	0	0
Ingerslev_UT	bowtie1_13	limma	mean	0	0
Ingerslev_UT	bowtie1_13	limma	median	0	0
Ingerslev_UT	bowtie1_15	DESeq2	mean	0.54	0.53
Ingerslev_UT	bowtie1_15	DESeq2	median	0	0
Ingerslev_UT	bowtie1_15	edgeR	mean	0	0
Ingerslev_UT	bowtie1_15	edgeR	median	0	0
Ingerslev_UT	bowtie1_15	limma	mean	0	0
Ingerslev_UT	bowtie1_15	limma	median	0	0
Ingerslev_UT	bowtie1_5	DESeq2	mean	0.48	0.53
Ingerslev_UT	bowtie1_5	DESeq2	median	0.5	0.5
Ingerslev_UT	bowtie1_5	edgeR	mean	0	0
Ingerslev_UT	bowtie1_5	edgeR	median	0	0
Ingerslev_UT	bowtie1_5	limma	mean	0	0
Ingerslev_UT	bowtie1_5	limma	median	0	0
Ingerslev_UT	bowtie1_7	DESeq2	mean	0.52	0.51
Ingerslev_UT	bowtie1_7	DESeq2	median	0	0
Ingerslev_UT	bowtie1_7	edgeR	mean	0	0
Ingerslev_UT	bowtie1_7	edgeR	median	0	0
Ingerslev_UT	bowtie1_7	limma	mean	0	0
Ingerslev_UT	bowtie1_7	limma	median	0	0
Ingerslev_UT	bowtie1_9	DESeq2	mean	0.5	0.5
Ingerslev_UT	bowtie1_9	DESeq2	median	0	0
Ingerslev_UT	bowtie1_9	edgeR	mean	0	0
Ingerslev_UT	bowtie1_9	edgeR	median	0	0
Ingerslev_UT	bowtie1_9	limma	mean	0	0
Ingerslev_UT	bowtie1_9	limma	median	0	0
Ingerslev_UT	hisat2_11	DESeq2	mean	0.53	0.54
Ingerslev_UT	hisat2_11	DESeq2	median	0	0
Ingerslev_UT	hisat2_11	edgeR	mean	0	0
Ingerslev_UT	hisat2_11	edgeR	median	0	0
Ingerslev_UT	hisat2_11	limma	mean	0	0
Ingerslev_UT	hisat2_11	limma	median	0	0
Ingerslev_UT	hisat2_13	DESeq2	mean	0.53	0.55
Ingerslev_UT	hisat2_13	DESeq2	median	0.67	0.5
Ingerslev_UT	hisat2_13	edgeR	mean	0	0
Ingerslev_UT	hisat2_13	edgeR	median	0	0
Ingerslev_UT	hisat2_13	limma	mean	0	0
Ingerslev_UT	hisat2_13	limma	median	0	0
Ingerslev_UT	hisat2_15	DESeq2	mean	0.53	0.55
Ingerslev_UT	hisat2_15	DESeq2	median	0.62	0.5
Ingerslev_UT	hisat2_15	edgeR	mean	0	0
Ingerslev_UT	hisat2_15	edgeR	median	0	0
Ingerslev_UT	hisat2_15	limma	mean	0	0
Ingerslev_UT	hisat2_15	limma	median	0	0
Ingerslev_UT	hisat2_5	DESeq2	mean	0.52	0.51
Ingerslev_UT	hisat2_5	DESeq2	median	0	0
Ingerslev_UT	hisat2_5	edgeR	mean	0	0
Ingerslev_UT	hisat2_5	edgeR	median	0	0
Ingerslev_UT	hisat2_5	limma	mean	0	0
Ingerslev_UT	hisat2_5	limma	median	0	0
Ingerslev_UT	hisat2_7	DESeq2	mean	0.54	0.54
Ingerslev_UT	hisat2_7	DESeq2	median	0	0
Ingerslev_UT	hisat2_7	edgeR	mean	0	0
Ingerslev_UT	hisat2_7	edgeR	median	0	0
Ingerslev_UT	hisat2_7	limma	mean	0	0
Ingerslev_UT	hisat2_7	limma	median	0	0
Ingerslev_UT	hisat2_9	DESeq2	mean	0.54	0.55
Ingerslev_UT	hisat2_9	DESeq2	median	0.66	0.5
Ingerslev_UT	hisat2_9	edgeR	mean	0	0
Ingerslev_UT	hisat2_9	edgeR	median	0	0
Ingerslev_UT	hisat2_9	limma	mean	0	0
Ingerslev_UT	hisat2_9	limma	median	0	0
Ingerslev_UT	STAR_11	DESeq2	mean	0.52	0.51
Ingerslev_UT	STAR_11	DESeq2	median	0	0
Ingerslev_UT	STAR_11	edgeR	mean	0	0
Ingerslev_UT	STAR_11	edgeR	median	0	0
Ingerslev_UT	STAR_11	limma	mean	0	0
Ingerslev_UT	STAR_11	limma	median	0	0
Ingerslev_UT	STAR_13	DESeq2	mean	0.54	0.54
Ingerslev_UT	STAR_13	DESeq2	median	0	0
Ingerslev_UT	STAR_13	edgeR	mean	0	0
Ingerslev_UT	STAR_13	edgeR	median	0	0
Ingerslev_UT	STAR_13	limma	mean	0	0
Ingerslev_UT	STAR_13	limma	median	0	0
Ingerslev_UT	STAR_15	DESeq2	mean	0.52	0.54
Ingerslev_UT	STAR_15	DESeq2	median	0	0
Ingerslev_UT	STAR_15	edgeR	mean	0	0
Ingerslev_UT	STAR_15	edgeR	median	0	0
Ingerslev_UT	STAR_15	limma	mean	0	0
Ingerslev_UT	STAR_15	limma	median	0	0
Ingerslev_UT	STAR_5	DESeq2	mean	0.56	0.5
Ingerslev_UT	STAR_5	DESeq2	median	0	0
Ingerslev_UT	STAR_5	edgeR	mean	0	0
Ingerslev_UT	STAR_5	edgeR	median	0	0
Ingerslev_UT	STAR_5	limma	mean	0	0
Ingerslev_UT	STAR_5	limma	median	0	0
Ingerslev_UT	STAR_7	DESeq2	mean	0.58	0.51
Ingerslev_UT	STAR_7	DESeq2	median	0	0
Ingerslev_UT	STAR_7	edgeR	mean	0	0
Ingerslev_UT	STAR_7	edgeR	median	0	0
Ingerslev_UT	STAR_7	limma	mean	0	0
Ingerslev_UT	STAR_7	limma	median	0	0
Ingerslev_UT	STAR_9	DESeq2	mean	0.54	0.54
Ingerslev_UT	STAR_9	DESeq2	median	0	0
Ingerslev_UT	STAR_9	edgeR	mean	0	0
Ingerslev_UT	STAR_9	edgeR	median	0	0
Ingerslev_UT	STAR_9	limma	mean	0	0
Ingerslev_UT	STAR_9	limma	median	0	0

## Sheet: S10.Assignment ratesSPORTS&sRNA
Author	sRNAnalyzer, 0 mismatches allowed	sRNAnalyzer, 1 mismatch allowed	sRNAnalyzer, 2 mismatches allowed	SPORTS
Delker	0.44	0.19	0.05	0.65
Donkin	0.11	0.05	0.09	0.8
Hua	0.36	0.18	0.04	0.63
Huang	0.51	0.16	0.03	0.73
Ingerslev	0.07	0.04	0.08	0.66
Morgan	0.1	0.04	0.04	0.75
Wong	0.37	0.05	0.04	0.48
mean rate	0.28	0.101429	0.0528571	0.671429
